# Supplementary material for: Microfractures, autologous matrix-induced chondrogenesis, osteochondral autograft transplantation and autologous chondrocyte implantation for knee chondral defects: a systematic review and network meta-analysis of randomized controlled trials
Source: PubMed Central journal article supplement — EFORT Open Rev. 2024 Aug 1;9(8):785–95. doi: 10.1530/EOR-23-0089 (PMC11370723; doi:10.1530/eor-23-0089), 2024-08-01
Supplement: EOR-23-0089supplementary_appendix_1.pdf [file EOR-23-0089supplementary_appendix_1.pdf]

Appendix 1: search strategy

| Source (platform)                                                                                                                                          | RCT filter applied (item number)      | Search strategy                                                                                                                                                                                                                                                                                                                                                                                                                                                                                                                                                                                                                                                                                                                                                                                                                                                                                                                                                                                                                                                                                                                                                                                                                                                                                                                                                                                                                                                                                                                                                                                                                                                                                                                                                                                                                                                                                                                                                                                                                                                                                                                                                                                                                                                                                                                                                                                                                             |
|------------------------------------------------------------------------------------------------------------------------------------------------------------|---------------------------------------|---------------------------------------------------------------------------------------------------------------------------------------------------------------------------------------------------------------------------------------------------------------------------------------------------------------------------------------------------------------------------------------------------------------------------------------------------------------------------------------------------------------------------------------------------------------------------------------------------------------------------------------------------------------------------------------------------------------------------------------------------------------------------------------------------------------------------------------------------------------------------------------------------------------------------------------------------------------------------------------------------------------------------------------------------------------------------------------------------------------------------------------------------------------------------------------------------------------------------------------------------------------------------------------------------------------------------------------------------------------------------------------------------------------------------------------------------------------------------------------------------------------------------------------------------------------------------------------------------------------------------------------------------------------------------------------------------------------------------------------------------------------------------------------------------------------------------------------------------------------------------------------------------------------------------------------------------------------------------------------------------------------------------------------------------------------------------------------------------------------------------------------------------------------------------------------------------------------------------------------------------------------------------------------------------------------------------------------------------------------------------------------------------------------------------------------------|
| <p>OVID Medline Epub Ahead of Print, In-Process &amp; Other Non-Indexed Citations, Ovid MEDLINE(R) Daily and Ovid MEDLINE(R) 1946 to Present (Ovid SP)</p> | <p>Cochrane – McGill formula (24)</p> | <ol style="list-style-type: none"> <li>1. exp Cartilage, Articular/ or exp Cartilage/ or exp Fractures, Cartilage/ or exp Hyaline Cartilage/ or exp Cartilage Diseases/</li> <li>2. cartilag*.mp.</li> <li>3. chondr*.mp.</li> <li>4. condyl*.mp.</li> <li>5. trochle*.mp.</li> <li>6. 1 or 2 or 3 or 4 or 5</li> <li>7. exp Knee/ or exp Knee Joint/ or exp Knee Injuries/</li> <li>8. exp Patella/in, pa, su, tr [Injuries, Pathology, Surgery, Transplantation]</li> <li>9. knee.mp.</li> <li>10. patella.mp.</li> <li>11. 7 or 8 or 9 or 10</li> <li>12. 6 and 11</li> <li>13. exp Arthroplasty, Subchondral/</li> <li>14. exp Bone Transplantation/</li> <li>15. exp Transplantation, Autologous/</li> <li>16. exp Transplantation, Homologous/</li> <li>17. autologous transplantation*.mp.</li> <li>18. chondrocyte* implant*.mp.</li> <li>19. chondrocyte* transplantation*.mp.</li> <li>20. microfracture*.mp.</li> <li>21. mosaicplast*.mp.</li> <li>22. chondrosphere.mp.</li> <li>23. amic.mp.</li> <li>24. ((randomized controlled trial or controlled clinical trial).pt. or randomized.ab. or randomised.ab. or placebo.ab. or drug therapy.fs. or randomly.ab. or trial.ab. or groups.ab.) not (exp animals/ not humans.sh.)</li> <li>25. 13 or 14 or 15 or 16 or 17 or 18 or 19 or 20 or 21 or 22 or 23</li> <li>26. 12 and 24 and 25</li> </ol>                                                                                                                                                                                                                                                                                                                                                                                                                                                                                                                                                                                                                                                                                                                                                                                                                                                                                                                                                                                                                                                                           |
| <p>EMBASE (Ovid SP)</p>                                                                                                                                    | <p>Cochrane – McGill formula (25)</p> | <ol style="list-style-type: none"> <li>1. cartilage/ or hyaline cartilage/ or cartilage fracture/ or cartilage injury/</li> <li>2. cartilag*.mp.</li> <li>3. chondr*.mp.</li> <li>4. condyl*.mp.</li> <li>5. trochle*.mp.</li> <li>6. 1 or 2 or 3 or 4 or 5</li> <li>7. knee/ or knee injury/</li> <li>8. patella/su [Surgery]</li> <li>9. knee.mp.</li> <li>10. patella.mp.</li> <li>11. 7 or 8 or 9 or 10</li> <li>12. 6 and 11</li> <li>13. chondrocyte implant/</li> <li>14. engineered cartilage graft/</li> <li>15. mosaicplasty/</li> <li>16. microfracture/</li> <li>17. spherex/</li> <li>18. autologous transplantation*.mp.</li> <li>19. chondrocyte* implant*.mp.</li> <li>20. microfracture*.mp.</li> <li>21. mosaicplast*.mp.</li> <li>22. chondrosphere.mp.</li> <li>23. amic.mp.</li> <li>24. 13 or 14 or 15 or 16 or 17 or 18 or 19 or 20 or 21 or 22 or 23</li> <li>25. (Randomized controlled trial/ or Controlled clinical study/ or random\$.ti,ab. or randomization/ or intermethod comparison/ or placebo.ti,ab. or (compare or compared or comparison).ti. or ((evaluated or evaluate or evaluating or assessed or assess) and (compare or compared or comparing or comparison)).ab. or (open adj label).ti,ab. or ((double or single or doubly or singly) adj (blind or blinded or blindly)).ti,ab. or double blind procedure/ or parallel group\$1.ti,ab. or (crossover or cross over).ti,ab. or ((assign\$ or match or matched or allocation) adj5 (alternate or group\$1 or intervention\$1 or patient\$1 or subject\$1 or participant\$1)).ti,ab. or (assigned or allocated).ti,ab. or (controlled adj7 (study or design or trial)).ti,ab. or (volunteer or volunteers).ti,ab. or human experiment/ or trial.ti.) not (((random\$ adj sampl\$ adj7 ("cross section\$" or questionnaire\$1 or survey\$ or database\$1)).ti,ab. not (comparative study/ or controlled study/ or randomi?ed controlled.ti,ab. or randomly assigned.ti,ab.)) or (Cross-sectional study/ not (randomized controlled trial/ or controlled clinical study/ or controlled study/ or randomi?ed controlled.ti,ab. or control group\$1.ti,ab.)) or (((case adj control\$) and random\$) not randomi?ed controlled).ti,ab. or (Systematic review not (trial or study)).ti. or (nonrandom\$ not random\$).ti,ab. or "Random field".ti,ab. or (random cluster adj3 sampl\$).ti,ab. or (review.ab. and review.pt.) not trial.ti.)</li> </ol> |

|                                                                |                                |                                                                                                                                                                                                                                                                                                                                                                                                                                                                                                                                                                                                                                                                                                                                                                                                                                                                                                                                                                                                                                                                                                                                                                                                                                                                                                                                                                                                                                                                                                        |
|----------------------------------------------------------------|--------------------------------|--------------------------------------------------------------------------------------------------------------------------------------------------------------------------------------------------------------------------------------------------------------------------------------------------------------------------------------------------------------------------------------------------------------------------------------------------------------------------------------------------------------------------------------------------------------------------------------------------------------------------------------------------------------------------------------------------------------------------------------------------------------------------------------------------------------------------------------------------------------------------------------------------------------------------------------------------------------------------------------------------------------------------------------------------------------------------------------------------------------------------------------------------------------------------------------------------------------------------------------------------------------------------------------------------------------------------------------------------------------------------------------------------------------------------------------------------------------------------------------------------------|
|                                                                |                                | <p>or ("we searched".ab. and (review.ti. or review.pt.)) or "update review".ab. or (databases adj4 searched).ab. or ((rat or rats or mouse or mice or swine or porcine or murine or sheep or lambs or pigs or piglets or rabbit or rabbits or cat or cats or dog or dogs or cattle or bovine or monkey or monkeys or trout or marmoset\$1).ti. and animal experiment/) or (Animal experiment/ not (human experiment/ or human/)))</p> <p>26. 12 and 24 and 25</p>                                                                                                                                                                                                                                                                                                                                                                                                                                                                                                                                                                                                                                                                                                                                                                                                                                                                                                                                                                                                                                      |
| CINAHL<br>(EBSCOhost)                                          | Cochrane – McGill formula (23) | <ol style="list-style-type: none"> <li>1. (MH "Cartilage+") OR (MH "Fractures, Cartilage") OR (MH "Cartilage, Articular") OR (MH "Cartilage Diseases+") OR (MH "Chondrocytes") / 20791</li> <li>2. cartilag*</li> <li>3. chondr*</li> <li>4. condyl*</li> <li>5. trochle*</li> <li>6. 1 or 2 or 3 or 4 or 5</li> <li>7. (MH "Knee Injuries, Articular Cartilage") OR (MH "Knee") OR (MH "Knee Injuries+")</li> <li>8. (MH "Patella")</li> <li>9. "knee"</li> <li>10. "patella"</li> <li>11. 7 or 8 or 9 or 10</li> <li>12. 6 and 11</li> <li>13. (MH "Bone Regeneration")</li> <li>14. (MH "Knee Surgery")</li> <li>15. (MH "Arthroplasty, Subchondral")</li> <li>16. autologous transplantation*</li> <li>17. chondrocyte* implant*</li> <li>18. microfracture*</li> <li>19. mosaicplast*</li> <li>20. chondrosphere</li> <li>21. amic</li> <li>22. 13 or 14 or 15 or 16 or 17 or 18 or 19 or 20 or 21</li> <li>23. (randomized controlled trials OR MH double-blind studies OR MH single-blind studies OR MH random assignment OR MH pretest-posttest design OR MH cluster sample OR TI (randomised OR randomized) OR AB (random*) OR TI (trial) OR (MH (sample size) AND AB (assigned OR allocated OR control) OR MH (placebos) OR PT (randomized controlled trial) OR AB (control W5 group) OR MH (crossover design) OR MH (comparative studies) OR AB (cluster W3 RCT)) NOT ((MH animals+ OR MH animal studies OR TI animal model*) NOT MH human) 844987</li> <li>24. 12 and 22 and 23</li> </ol> |
| Web of Science core collection<br>(Clarivate – Web of Science) | Any                            | <ol style="list-style-type: none"> <li>1. ALL=(cartilag*)</li> <li>2. ALL=(chondr*)</li> <li>3. ALL=(condyl*)</li> <li>4. ALL=(trochle*)</li> <li>5. 1 or 2 or 3 or 4</li> <li>6. ALL=(knee)</li> <li>7. ALL=(patella)</li> <li>8. 6 or 7</li> <li>9. 5 and 8</li> <li>10. ALL=(autologous transplantation)</li> <li>11. ALL=(chondrocyte* implant*)</li> <li>12. ALL=(chondrocyte* transplantation*)</li> <li>13. ALL=(microfracture*)</li> <li>14. ALL=(mosaicplast*)</li> <li>15. ALL=(chondrosphere)</li> <li>16. ALL=(amic)</li> <li>17. 10 or 11 or 12 or 13 or 14 or 15 or 16</li> <li>18. ALL=(randomi?ed controlled trial)</li> <li>19. 9 and 17 and 18</li> </ol>                                                                                                                                                                                                                                                                                                                                                                                                                                                                                                                                                                                                                                                                                                                                                                                                                            |
| CENTRAL (The Cochrane Library)                                 | Any                            | <ol style="list-style-type: none"> <li>1. MeSH descriptor: [Cartilage] this term only</li> <li>2. MeSH descriptor: [Cartilage, Articular] explode all trees</li> <li>3. MeSH descriptor: [Fractures, Cartilage] this term only</li> <li>4. cartilag*:kw</li> <li>5. chondr*:kw</li> <li>6. condyl*:kw</li> <li>7. trochle*:kw</li> <li>8. 1 or 2 or 3 or 4 or 5 or 6 or 7</li> <li>9. MeSH descriptor: [Knee] this term only</li> <li>10. MeSH descriptor: [Knee Injuries] explode all trees</li> <li>11. knee:kw</li> <li>12. patella:kw</li> <li>13. MeSH descriptor: [Patella] this term only</li> <li>14. 9 or 10 or 11 or 12 or 13</li> <li>15. 8 and 14</li> </ol>                                                                                                                                                                                                                                                                                                                                                                                                                                                                                                                                                                                                                                                                                                                                                                                                                               |

|                                                                                                                                                                                                                                                                                                                                                                                                                                                                                                                                                         |                                           |                                                                                                                                                                                                                                                                                                                                                                                                                                                                                                                                                                                                                                                                                                                                                                                                                                                                                                                                                                                                                                                          |
|---------------------------------------------------------------------------------------------------------------------------------------------------------------------------------------------------------------------------------------------------------------------------------------------------------------------------------------------------------------------------------------------------------------------------------------------------------------------------------------------------------------------------------------------------------|-------------------------------------------|----------------------------------------------------------------------------------------------------------------------------------------------------------------------------------------------------------------------------------------------------------------------------------------------------------------------------------------------------------------------------------------------------------------------------------------------------------------------------------------------------------------------------------------------------------------------------------------------------------------------------------------------------------------------------------------------------------------------------------------------------------------------------------------------------------------------------------------------------------------------------------------------------------------------------------------------------------------------------------------------------------------------------------------------------------|
|                                                                                                                                                                                                                                                                                                                                                                                                                                                                                                                                                         |                                           | <ul style="list-style-type: none"> <li>16. MeSH descriptor: [Arthroplasty, Subchondral] explode all trees</li> <li>17. MeSH descriptor: [Bone Transplantation] this term only</li> <li>18. MeSH descriptor: [Transplantation, Autologous] this term only</li> <li>19. autologous transplantation*:kw</li> <li>20. chondrocyte* implant*:kw</li> <li>21. chondrocyte* transplantation*:kw</li> <li>22. microfracture*:kw</li> <li>23. mosaicplast*.kw</li> <li>24. chondrosphere</li> <li>25. amic</li> <li>26. 16 or 17 or 18 or 19 or 20 or 21 or 22 or 23 or 24 or 25</li> <li>27. 15 and 26</li> </ul>                                                                                                                                                                                                                                                                                                                                                                                                                                                |
| SPORTDiscus (EBSCOhost)                                                                                                                                                                                                                                                                                                                                                                                                                                                                                                                                 | Cochrane – McGill formula for Cinhal (17) | <ul style="list-style-type: none"> <li>1. cartilag*</li> <li>2. chondr*</li> <li>3. condyl*</li> <li>4. trochle*</li> <li>5. 1 or 2 or 3 or 4</li> <li>6. "knee"</li> <li>7. "patella"</li> <li>8. 6 or 7</li> <li>9. 5 and 8</li> <li>10. autologous transplantation*</li> <li>11. chondrocyte* implant*</li> <li>12. microfracture*</li> <li>13. mosaicplast*</li> <li>14. chondrosphere</li> <li>15. amic</li> <li>16. 10 or 11 or 12 or 13 or 14 or 15</li> <li>17. (randomized controlled trials OR MH double-blind studies OR MH single-blind studies OR MH random assignment OR MH pretest-posttest design OR MH cluster sample OR TI (randomised OR randomized) OR AB (random*) OR TI (trial) OR (MH (sample size) AND AB (assigned OR allocated OR control)) OR MH (placebos) OR PT (randomized controlled trial) OR AB (control W5 group) OR MH (crossover design) OR MH (comparative studies) OR AB (cluster W3 RCT)) NOT ((MH animals+ OR MH animal studies OR TI animal model*) NOT MH human) 82598</li> <li>18. 9 and 16 and 17</li> </ul> |
| Clinicaltrials.gov ( <a href="http://www.clinicaltrials.gov">www.clinicaltrials.gov</a> )                                                                                                                                                                                                                                                                                                                                                                                                                                                               | Interventional                            | Interventional Studies   knee AND (cartilage OR chondral OR osteochondral) AND (implantation OR transplantation OR microfracture OR mosaicplasty)<br>Also searched for Implant.                                                                                                                                                                                                                                                                                                                                                                                                                                                                                                                                                                                                                                                                                                                                                                                                                                                                          |
| ICTRP Search Portal [includes: Australian New Zealand Clinical Trials Registry; ClinicalTrilas.gov; ISRCTN; Chinese Clinical Trial Registry; Clinical Trials Registry – India; Clinical Research Information Service – Republic of Korea; German Clinical Trials Register; Iranian Registry of Clinical Trials; Japan Primary Registries Network; Pan African Clinical Trial Registry; Sri Lanka Clinical Trials Registry; The Netherlands National Trial Register] ( <a href="http://apps.who.int/trialssearch">http://apps.who.int/trialssearch</a> ) | Any                                       | Title: Knee<br>AND Condition: cartilage OR Chondral OR Osteochondral<br>AND Intervention: Transplantation OR Implantation OR Microfracture OR Mosaicplasty<br>Recruitment status ALL                                                                                                                                                                                                                                                                                                                                                                                                                                                                                                                                                                                                                                                                                                                                                                                                                                                                     |
