# Supplementary material for: Microfractures, autologous matrix-induced chondrogenesis, osteochondral autograft transplantation and autologous chondrocyte implantation for knee chondral defects: a systematic review and network meta-analysis of randomized controlled trials
Source: PubMed Central journal article supplement — EFORT Open Rev. 2024 Aug 1;9(8):785–95. doi: 10.1530/EOR-23-0089 (PMC11370723; doi:10.1530/eor-23-0089), 2024-08-01
Supplement: EOR-23-0089supplementary_appendix_2.pdf [file EOR-23-0089supplementary_appendix_2.pdf]

|                                                                                          |           |
|------------------------------------------------------------------------------------------|-----------|
| <b>APPENDIX 2</b> .....                                                                  | <b>2</b>  |
| <b>SECTION A</b> .....                                                                   | <b>2</b>  |
| <b>APPENDIX A1: OUTCOME MEASURES</b> .....                                               | <b>2</b>  |
| <b>APPENDIX A2: DEMOGRAPHIC DATA</b> .....                                               | <b>3</b>  |
| <b>APPENDIX A3: SUMMARY OF TRIALS' DEMOGRAPHIC DATA</b> .....                            | <b>6</b>  |
| <b>APPENDIX A4: ADVERSE EVENTS CONSERVATIVELY TREATED</b> .....                          | <b>8</b>  |
| <b>APPENDIX A5: ADVERSE EVENTS SURGICALLY TREATED</b> .....                              | <b>10</b> |
| <b>APPENDIX A6: FOLLOW-UP DURATION</b> .....                                             | <b>12</b> |
| <b>APPENDIX A7: FUNCTIONAL SCORES</b> .....                                              | <b>14</b> |
| <b>SECTION B</b> .....                                                                   | <b>15</b> |
| <b>APPENDIX B1: NET-PLOTS FOR THE CLINICAL SCORES</b> .....                              | <b>15</b> |
| <b>APPENDIX B2: FOREST PLOTS FOR THE CLINICAL SCORES</b> .....                           | <b>17</b> |
| <b>APPENDIX B3: RANKOGRAM FOR THE CLINICAL SCORES</b> .....                              | <b>20</b> |
| <b>APPENDIX B4: NET-PLOTS FOR THE ADVERSE EVENTS</b> .....                               | <b>24</b> |
| <b>APPENDIX B5: FOREST PLOTS FOR THE ADVERSE EVENTS</b> .....                            | <b>25</b> |
| <b>APPENDIX B6: RANKOGRAM FOR THE ADVERSE EVENTS</b> .....                               | <b>26</b> |
| <b>APPENDIX B7: FOREST PLOTS OF THE SUBGROUP ANALYSIS, FOR THE CLINICAL SCORES</b> ..... | <b>27</b> |
| <b>APPENDIX B8: FOREST PLOTS OF THE SUBGROUP ANALYSIS, FOR THE ADVERSE EVENTS</b> .....  | <b>29</b> |
| <b>APPENDIX B9: FUNNEL PLOTS</b> .....                                                   | <b>31</b> |
| <b>SECTION C</b> .....                                                                   | <b>32</b> |
| <b>APPENDIX C1: RISK OF BIAS ASSESSMENT</b> .....                                        | <b>32</b> |
| <b>APPENDIX C2: GRADE</b> .....                                                          | <b>33</b> |
| <b>APPENDIX C3: PAIRWISE COMPARISON AND TRANSITIVITY</b> .....                           | <b>34</b> |

## APPENDIX 2

### SECTION A

#### Appendix A1: Outcome measures

##### Publication data:

First author, publication date, main country, international, number of involved centers, registration status

##### Demographic data:

Trial arms, treatments, number of knees at randomization, total knees at randomization, procedure type (open, arthro, mini open), number of non-weightbearing postoperative weeks, total males in the whole trial population, mean age per trial arm, age standard deviation per trial arm, age minimum and maximum per trial arm, osteochondritis dissecans: yes/no per trial population, chondromalacia patellae, tibial plateau lesions, trochlea lesions, single lesions versus multiple lesions, defect size: mean, minimum, maximum per trial arm, mean symptoms duration in years, concomitant knee surgery, prior cartilage operation, prior knee operation, follow-up mean, knees at short – intermediate – long term, last follow-up sample size per trial arm, total number of analysed knees, intention-to-treat versus per-protocol

##### Clinical and functional outcome measures:

At short, intermediate and long term,

Mean, standard deviation, variance, median, interquartile 1 and 3, minimum, maximum, confidence interval for KOOS, Lysholm, Tegner, IKDC, modified Cincinnati, WOMAC, HSS

##### Safety outcomes:

Infection, symptomatic cartilage loosening, neuroapraxia of the saphenous nerve, deep vein thrombosis or pulmonary embolism, persistent pain conservatively treated, limitation of the range of motion conservatively treated, reoperation such as arthroscopy, adesiolysis, meniscectomy, debridement, drainage of hematoma, reoperation such as open or arthroscopic cartilage revision, reoperation as total knee arthroplasty, reoperation such as open surgery different than cartilage revision, total number of reoperations, development of arthritis, failure definition and absolute number per trial group, total failures, total patient number with complications.

The outcome measures for postoperative MRI, 2<sup>nd</sup> look surgery, and conflicts of interest are shown in Appendix 2, section C.

## Appendix A2: Demographic Data

| STUDY                                | TREATMENT ARM | KNEES <sup>□</sup> | OVERALL MALES | MEAN AGE years | OVERALL OCD      | OVERALL AFFECTED SITES | OVERALL NUMBER OF LESIONS TREATED FOR INDEX KNEE | DEFECT SIZE*- mean cm <sup>2</sup> | MEAN SYMPTOMS DURATION years | OVERALL CONCOMITANT SURGERY | OVERALL PRIOR MF AND CARTILAGE DEBRIDEMENT | OVERALL PRIOR NON-CARTILAGE KNEE SURGERY | MATERIALS AND TECHNIQUES             | OVERALL NWB WEEKS |
|--------------------------------------|---------------|--------------------|---------------|----------------|------------------|------------------------|--------------------------------------------------|------------------------------------|------------------------------|-----------------------------|--------------------------------------------|------------------------------------------|--------------------------------------|-------------------|
| Horas et al. 2003 <sup>1</sup>       | ACI1          | 20                 | 23            | 31.4           | no               | FC                     | 1                                                | 3.86                               | n.a.                         | no                          | yes                                        | yes                                      | Periost                              | 2                 |
|                                      | OCT           | 20                 |               | 35.4           |                  |                        |                                                  | 3.63                               | n.a.                         |                             |                                            |                                          | 0.1 mm plugs                         |                   |
| Schneider et al. 2003 <sup>2</sup>   | ACI3          | 10                 | n.a.          | 37.2           | yes              | FC, P, T               | 2                                                | 5.78                               | n.a.                         | n.a.                        | n.a.                                       | yes                                      | CaRes                                | n.a.              |
|                                      | ACI1          | 10                 |               | 38.8           |                  |                        |                                                  | 6.63                               | n.a.                         |                             |                                            |                                          | Periost                              |                   |
| Dozin et al. 2005 <sup>3</sup>       | ACI1          | 22                 | 27            | 29.61          | no               | FC, P                  | 1                                                | n.a.                               | n.a.                         | no                          | yes                                        | n.a.                                     | Periost                              | 2                 |
|                                      | OCT           | 22                 |               | 27.89          |                  |                        |                                                  | n.a.                               | n.a.                         |                             |                                            |                                          | n.a.                                 |                   |
| Gooding et al. 2006 <sup>4</sup>     | ACI2          | 35                 | n.a.          | 30.54          | yes              | FC, P, T               | 1                                                | n.a.                               | 7.09                         | no                          | yes                                        | yes                                      | Porcine type I-III collagen membrane | 0                 |
|                                      | ACI1          | 33                 |               | 30.52          |                  |                        |                                                  | n.a.                               | 7.09                         |                             |                                            |                                          | Periost                              |                   |
| Basad et al. 2010 <sup>5</sup>       | ACI3          | 40                 | 42            | 33             | no               | FC, P, T               | 1                                                | n.a.                               | 2.2                          | yes                         | no <sup>0</sup>                            | n.a.                                     | MACItm                               | 6                 |
|                                      | MF            | 20                 |               | 37.5           |                  |                        |                                                  | n.a.                               | 2.5                          |                             |                                            |                                          | Steadman <sup>40</sup>               |                   |
| Vanlauwe et al. 2011 <sup>6-8</sup>  | ACI1          | 51                 | 76            | 33.9           | yes              | FC                     | 1                                                | 2.6*                               | 1.97                         | yes                         | yes                                        | yes                                      | Periost                              | 2                 |
|                                      | MF            | 61                 |               | 33.9           |                  |                        |                                                  | 2.4*                               | 1.57                         |                             |                                            |                                          | Steadman <sup>40</sup>               |                   |
| Gudas et al. 2012 <sup>9,10</sup>    | OCT           | 30                 | 36            | 24.6           | yes              | FC                     | 1                                                | 2.8                                | 1.7                          | no                          | no                                         | no                                       | 5.5mm plugs                          | 4                 |
|                                      | MF            | 30                 |               | 24.3           |                  |                        |                                                  | 2.77                               | 1.7                          |                             |                                            |                                          | Steadman <sup>40</sup>               |                   |
| Lim et al. 2012 <sup>11</sup>        | MF            | 30                 | 39            | 32.9           | no               | FC                     | 1                                                | 2.77                               | n.a.                         | no                          | no                                         | no                                       | 0.5mm tapered awls                   | 0                 |
|                                      | OCT           | 22                 |               | 30.4           |                  |                        |                                                  | 2.75                               | n.a.                         |                             |                                            |                                          | 4,6,8 mm plugs                       |                   |
|                                      | ACI1          | 18                 |               | 25.1           |                  |                        |                                                  | 2.84                               | n.a.                         |                             |                                            |                                          | Periost                              |                   |
| Shive et al. 2015 <sup>12,13</sup>   | AMIC          | 41                 | 48            | 35.1           | no               | FC                     | 1                                                | 2.32*                              | 1.25                         | no <sup>0</sup>             | yes <sup>0</sup>                           | yes <sup>0</sup>                         | BSTCar-gel                           | 6                 |
|                                      | MF            | 39                 |               | 37.2           |                  |                        |                                                  | 1.95*                              | 2.17                         |                             |                                            |                                          | Steadman <sup>40</sup>               |                   |
| Clavé et al. 2016 <sup>14</sup>      | ACI3          | 30                 | 40            | 29.2           | yes <sup>0</sup> | FC                     | 1                                                | 3.9*                               | n.a.                         | no <sup>0</sup>             | no <sup>0</sup>                            | yes <sup>0</sup>                         | Cartipatch                           | 4                 |
|                                      | OCT           | 25                 |               | 28.3           |                  |                        |                                                  | 4.7*                               | n.a.                         |                             |                                            |                                          | Plugs                                |                   |
| Knutsen et al. 2016 <sup>15-17</sup> | ACI1          | 40                 | 48            | 33.3           | yes              | FC                     | 1                                                | 5.1                                | 3                            | no                          | yes                                        | yes                                      | Periost                              | n.a.              |
|                                      | MF            | 40                 |               | 31.1           |                  |                        |                                                  | 4.5                                | 3                            |                             |                                            |                                          | Steadman <sup>40</sup>               |                   |
| Volz et al. 2017 <sup>18,19</sup>    | AMIC          | 34                 | 37            | 36.5           | yes              | FC, P, T               | 2                                                | 3.85*                              | n.a.                         | no                          | no                                         | yes                                      | Chondrogide                          | 0                 |
|                                      | MF            | 13                 |               | 40             |                  |                        |                                                  | 2.9*                               | n.a.                         |                             |                                            |                                          | Steadman <sup>40</sup>               |                   |

|                                        |           |    |    |      |     |          |   |       |      |     |      |      |                                      |   |
|----------------------------------------|-----------|----|----|------|-----|----------|---|-------|------|-----|------|------|--------------------------------------|---|
| Brittberg et al. 2018 <sup>20,21</sup> | ACI3      | 72 | 93 | 34.8 | yes | FC, T    | 2 | 5.8*  | 5.8  | yes | yes  | yes  | Porcine type I-III collagen membrane | 0 |
|                                        | MF        | 72 |    | 32.9 |     |          |   | 5.3*  | 3.7  |     |      |      | Steadman <sup>40</sup>               |   |
| Kane et al. 2018 <sup>22,23</sup>      | ACI3      | 21 | 25 | 41   | no  | FC       | 2 | 2.87* | 3    | yes | yes  | n.a. | Neocart                              | 0 |
|                                        | MF        | 9  |    | 39   |     |          |   | 2.52* | 2    |     |      |      | n.a.                                 |   |
| Solheim et al. 2018 <sup>24</sup>      | OCT       | 20 | 28 | 31   | no  | FC, T    | 2 | 3.4   | 4.3  | no  | n.a. | n.a. | n.a.                                 | 0 |
|                                        | MF        | 20 |    | 35   |     |          |   | 3.6   | 4.8  |     |      |      | Steadman <sup>40</sup>               |   |
| Barié et al. 2020 <sup>25,26</sup>     | ACI3      | 11 | 16 | 29.1 | yes | FC, P, T | 1 | 4.3   | 2    | yes | yes  | yes  | Bioseed-C                            | 0 |
|                                        | ACI1      | 10 |    | 29.5 |     |          |   | 4.1   | 2.7  |     |      |      | Periost                              |   |
| Glasbrenner et al. 2020 <sup>27</sup>  | AMIC      | 15 | 15 | 49.7 | no  | FC       | 1 | 1.7   | n.a. | no  | yes  | yes  | Chondrotissue                        | 6 |
|                                        | MF        | 15 |    | 36.7 |     |          |   | 1.7   | n.a. |     |      |      | Arthroscopic awl                     |   |
| Ibarra et al. 2021 <sup>28</sup>       | ACI3      | 24 | 31 | 33.7 | no  | FC, P, T | 1 | 1.9   | n.a. | yes | no   | yes  | Neoveil                              | 0 |
|                                        | MF        | 24 |    | 35.8 |     |          |   | 1.7   | n.a. |     |      |      | Steadman <sup>40</sup>               |   |
| Hoburg et al. 2022 <sup>29,31</sup>    | spheroids | 52 | 61 | 36   | yes | FC, P, T | 1 | 2.7*  | n.a. | no  | yes  | yes  | Co.don                               | 0 |
|                                        | MF        | 50 |    | 37   |     |          |   | 2.4*  | n.a. |     |      |      | Steadman <sup>40</sup>               |   |

Legend:

ACI1: autologous chondrocyte implantation with periosteal membrane.

ACI2: autologous chondrocyte implantation with collagen membrane.

ACI3: autologous chondrocyte implantation with scaffold.

AMIC: autologous matrix-induced chondrogenesis.

FC: femoral condyles.

MF: microfracture.

n.a.: not available.

NWB: non-weight bearing.

OCD: osteochondritis dissecans.

OCT: osteochondral transplantation.

P: patella.

Spheroids: chondrospheres (Co.don, produced according to the self-aggregation technique).

T: trochlea.

Data are presented for each trial arm in the following columns: knee, mean age, defect size, mean symptoms duration, materials and techniques. In the remaining columns data are presented for the overall trial population.

When multiple publications are available for the same trial, we have written the author and date of publication of the most recent one and in apex the references of all available publications.

number of randomized knees.

\*: post-debridement mean defect size. Pre-debridement mean defect size where not indicated.

Ø: information verified with the trial author, by email.

## Appendix A3: Summary of Trials' Demographic Data

|           | TRIALS | N. OF KNEES (%) | OCD INCLUDED / TRIAL N.* | N. TREATED LESIONS* | CONCOMITANT SURGERY*                 | OVERALL PRIOR MF AND CARTILAGE DEBRIDEMENT* | OVERALL PRIOR NON-CARTILAGE KNEE SURGERY* |
|-----------|--------|-----------------|--------------------------|---------------------|--------------------------------------|---------------------------------------------|-------------------------------------------|
| MF        | 13     | 421 (36.6)      | 6/13                     | 1: 9/13<br>2: 4/13  | Yes: 5/13<br>No: 8/13                | Yes: 7/13<br>No: 5/13<br>N.a.: 1/13         | Yes: 8/13<br>No: 2/13<br>N.a.: 3/13       |
| AMIC      | 3      | 90 (7.8)        | 1/3                      | 1: 2/3<br>2: 1/3    | No                                   | Yes: 2/3<br>No: 1/3<br>N.a.: 0/3            | Yes                                       |
| OCT       | 6      | 139 (12)        | 2/6                      | 1: 5/6<br>2: 1/6    | Yes: 1/6<br>No: 5/6                  | Yes: 2/6<br>No: 3/6<br>N.a.: 1/6            | Yes: 2/6<br>No: 2/6<br>N.a.: 2/6          |
| ACI1      | 8      | 204 (17.7)      | 5/8                      | 1: 7/8<br>2: 1/8    | Yes: 2/8<br>No: 5/8<br>N.a.: 1/8     | Yes: 6/8<br>No: 1/8<br>N.a.: 1/8            | Yes: 6/8<br>No: 1/8<br>N.a.: 1/8          |
| ACI2      | 1      | 35 (3)          | 1/1                      | 1                   | No                                   | Yes                                         | Yes                                       |
| ACI3      | 7      | 208 (18.1)      | 4/7                      | 1: 4/7<br>2: 3/7    | Yes: 5/7<br>No: 1/7<br>N.a.: 1/7     | Yes: 3/7<br>No: 3/7<br>N.a.: 1/7            | Yes: 5/7<br>N.a.: 2/7                     |
| SPHEROIDS | 1      | 52 (4.5)        | 1/1                      | 1                   | No                                   | Yes                                         | Yes                                       |
| OVERALL   | 19     | 1149            | 10/19                    | 1: 14/19<br>2: 5/19 | Yes: 6/19<br>No: 12/19<br>N.a.: 1/19 | Yes: 11/19<br>No: 6/19<br>N.a.: 2/19        | Yes: 13/19<br>No: 2/19<br>N.a.: 4/19      |

### Legend:

ACI1: autologous chondrocyte implantation with periosteal membrane.

ACI2: autologous chondrocyte implantation with collagen membrane.

ACI3: autologous chondrocyte implantation with scaffold.

AMIC: autologous matrix-induced chondrogenesis.

MF: microfracture.

N.: number.

n.a.: not available.

OCD: osteochondritis dissecans.

OCT: osteochondral transplantation.

Spheroids: chondrospheres (Co.don, produced according to the self-aggregation technique).

\*: according the eligibility criteria.

## Appendix A4: Adverse Events Conservatively Treated

| STUDY                                      | ARMS | MEAN FOLLOW-UP<br>months | INFECTION | NEUROAPRAXIA<br>SAPHENUS N. | DVT/PE | CONSERVATIVELY<br>TREATED<br>PERSISTENT<br>SYMPTOMS,<br>EFFUSION | CONSERVATIVELY<br>TREATED ROM<br>LIMITATION |
|--------------------------------------------|------|--------------------------|-----------|-----------------------------|--------|------------------------------------------------------------------|---------------------------------------------|
| Horas et al.<br>2003 <sup>1</sup>          | ACI1 | 24                       | 0         | 2                           | n.a.   | 2                                                                | 1                                           |
|                                            | OCT  | 24                       | 1         | 2                           | n.a.   | 0                                                                | 3                                           |
| Schneider<br>et al. 2003 <sup>2</sup>      | ACI3 | 6                        | n.a.      | n.a.                        | 0      | n.a.                                                             | n.a.                                        |
|                                            | ACI1 | 6                        | n.a.      | n.a.                        | 1      | n.a.                                                             | n.a.                                        |
| Dozin et al.<br>2005 <sup>3</sup>          | ACI1 | 36                       | n.a.      | n.a.                        | n.a.   | n.a.                                                             | n.a.                                        |
|                                            | OCT  | 36                       | n.a.      | n.a.                        | n.a.   | n.a.                                                             | n.a.                                        |
| Gooding et al.<br>2006 <sup>4</sup>        | ACI2 | 24                       | 0         | n.a.                        | 1      | n.a.                                                             | n.a.                                        |
|                                            | ACI1 | 24                       | 2         | n.a.                        | 0      | n.a.                                                             | n.a.                                        |
| Basad et al.<br>2010 <sup>5</sup>          | ACI3 | 24                       | 0         | n.a.                        | 0      | 0                                                                | n.a.                                        |
|                                            | MF   | 24                       | 0         | n.a.                        | 0      | 0                                                                | n.a.                                        |
| Vanlauwe et<br>al. 2011 <sup>6-8</sup>     | ACI1 | 60                       | n.a.      | n.a.                        | 1      | n.a.                                                             | n.a.                                        |
|                                            | MF   | 60                       | n.a.      | n.a.                        | 0      | n.a.                                                             | n.a.                                        |
| Gudas et al.<br>2012 <sup>9,10</sup>       | OCT  | 124.8                    | 2         | n.a.                        | n.a.   | n.a.                                                             | n.a.                                        |
|                                            | MF   | 124.8                    | 0         | n.a.                        | n.a.   | n.a.                                                             | n.a.                                        |
| Lim et al.<br>2012 <sup>11</sup>           | MF   | 80.4                     | n.a.      | n.a.                        | n.a.   | n.a.                                                             | n.a.                                        |
|                                            | OCT  | 69.6                     | n.a.      | n.a.                        | n.a.   | n.a.                                                             | n.a.                                        |
|                                            | ACI1 | 62.4                     | n.a.      | n.a.                        | n.a.   | n.a.                                                             | n.a.                                        |
| Shive et al.<br>2015 <sup>12,13</sup>      | AMIC | 60                       | n.a.      | n.a.                        | 1      | n.a.                                                             | n.a.                                        |
|                                            | MF   | 60                       | n.a.      | n.a.                        | 0      | n.a.                                                             | n.a.                                        |
| Clavé et al.<br>2016 <sup>14</sup>         | ACI3 | 24                       | 1         | n.a.                        | n.a.   | n.a.                                                             | n.a.                                        |
|                                            | OCT  | 24                       | 0         | n.a.                        | n.a.   | n.a.                                                             | n.a.                                        |
| Knutsen et<br>al. 2016 <sup>15-17</sup>    | ACI1 | 180                      | 0         | n.a.                        | 0      | n.a.                                                             | n.a.                                        |
|                                            | MF   | 180                      | 0         | n.a.                        | 0      | n.a.                                                             | n.a.                                        |
| Volz et al.<br>2017 <sup>18,19</sup>       | AMIC | 60                       | n.a.      | n.a.                        | n.a.   | n.a.                                                             | n.a.                                        |
|                                            | MF   | 60                       | n.a.      | n.a.                        | n.a.   | n.a.                                                             | n.a.                                        |
| Brittberg et<br>al. 2018 <sup>*20,21</sup> | ACI3 | 60                       | n.a.      | n.a.                        | n.a.   | n.a.                                                             | n.a.                                        |
|                                            | MF   | 60                       | n.a.      | n.a.                        | n.a.   | n.a.                                                             | n.a.                                        |
| Kane et al.<br>2018 <sup>22,23</sup>       | ACI3 | 60                       | n.a.      | n.a.                        | n.a.   | n.a.                                                             | n.a.                                        |
|                                            | MF   | 60                       | n.a.      | n.a.                        | n.a.   | n.a.                                                             | n.a.                                        |
| Solheim et                                 | OCT  | 192                      | 2         | n.a.                        | 1      | n.a.                                                             | n.a.                                        |



|                                          |           |       |      |      |      |      |      |
|------------------------------------------|-----------|-------|------|------|------|------|------|
| al. 2018 <sup>24</sup>                   | MF        | 192   | 0    | n.a. | 0    | n.a. | n.a. |
| Barié et al.<br>2020 <sup>25,26</sup>    | ACI3      | 115.2 | 0    | 0    | n.a. | 5    | n.a. |
|                                          | ACI1      | 103.2 | 0    | 0    | n.a. | 5    | n.a. |
| Glasbrenner<br>et al. 2020 <sup>27</sup> | AMIC      | 27    | 1    | n.a. | n.a. | 3    | 3    |
|                                          | MF        | 27    | n.a. | n.a. | n.a. | 1    | 0    |
| Ibarra et al.<br>2021 <sup>28</sup>      | ACI3      | 74    | n.a. | n.a. | n.a. | 13   | n.a. |
|                                          | MF        | 71    | 1    | n.a. | n.a. | 17   | n.a. |
| Hoburg et<br>al. 2022 <sup>29,31</sup>   | spheroids | 60    | n.a. | n.a. | 0    | n.a. | n.a. |
|                                          | MF        | 60    | n.a. | n.a. | 1    | n.a. | n.a. |

### Legend:

ACI1: autologous chondrocyte implantation, 1<sup>st</sup> generation.

ACI2: autologous chondrocyte implantation, 2<sup>nd</sup> generation.

ACI3: autologous chondrocyte implantation, 3<sup>rd</sup> generation.

AMIC: autologous matrix-induced chondrogenesis.

MF: microfracture.

n.a.: not available.

OCT: osteochondral transplantation.

Spheroids: chondrospheres (Co.don, produced according to the self-aggregation technique).

When multiple publications are available for the same trial, we have written the author and date of publication of the most recent one and in apex the references of all available publications.

Data describes patients affected by the considered adverse events for each trial arm.

Data on donor site morbidity in case of OCT is never mentioned apart from one study (Gudas et al. 2005) reporting its absence.

\*: data reported as safety events, not *per* patients.

## Appendix A5: Adverse Events Surgically Treated

| STUDY                                  | ARMS | MEAN FOLLOW-UP months | ARTHROSCOPY FOR OTHER KNEE SURGERY THAN CARTILAGE REVISION | SYMPTOMATIC CARTILAGE LOOSENING | SYMPTOMATIC CARTILAGE HYPERTROPHY | REOPERATION FOR CARTILAGE REVISION | CONVERSION TO TKA | ARTHRITIS * | OPEN KNEE SURGERY FOR OTHER THAN CARTILAGE REVISION | FAILURES | FAILURE definition                                                     |
|----------------------------------------|------|-----------------------|------------------------------------------------------------|---------------------------------|-----------------------------------|------------------------------------|-------------------|-------------|-----------------------------------------------------|----------|------------------------------------------------------------------------|
| Horas et al. 2003 <sup>1</sup>         | ACI1 | 24                    | 6                                                          | 0                               | n.a.                              | 0                                  | 0                 | n.a.        | 1                                                   | 1        | Intraoperative finding of thinned fibrocartilage in the treated defect |
|                                        | OCT  | 24                    | 7                                                          | 0                               | n.a.                              | 2                                  | 0                 | n.a.        | 0                                                   | 0        |                                                                        |
| Schneider et al. 2003 <sup>2</sup>     | ACI3 | 6                     | 1                                                          | n.a.                            | n.a.                              | 0                                  | 0                 | n.a.        | 0                                                   | n.a.     | n.a.                                                                   |
|                                        | ACI1 | 6                     | 1                                                          | n.a.                            | n.a.                              | 0                                  | 0                 | n.a.        | 0                                                   | n.a.     |                                                                        |
| Dozin et al. 2005 <sup>3</sup>         | ACI1 | 36                    | n.a.                                                       | n.a.                            | n.a.                              | n.a.                               | n.a.              | n.a.        | n.a.                                                | 1        | Lysholm<60                                                             |
|                                        | OCT  | 36                    | n.a.                                                       | n.a.                            | n.a.                              | n.a.                               | n.a.              | n.a.        | n.a.                                                | 0        |                                                                        |
| Gooding et al. 2006 <sup>4</sup>       | ACI2 | 24                    | 8                                                          | n.a.                            | 2                                 | n.a.                               | n.a.              | n.a.        | n.a.                                                | 0        | n.a.                                                                   |
|                                        | ACI1 | 24                    | 10                                                         | n.a.                            | 13                                | n.a.                               | n.a.              | n.a.        | n.a.                                                | 2        |                                                                        |
| Basad et al. 2010 <sup>5</sup>         | ACI3 | 24                    | n.a.                                                       | n.a.                            | n.a.                              | 1                                  | n.a.              | n.a.        | n.a.                                                | 0        | n.a.                                                                   |
|                                        | MF   | 24                    | n.a.                                                       | n.a.                            | n.a.                              | 1                                  | n.a.              | n.a.        | n.a.                                                | 1        |                                                                        |
| Valauwe et al. 2011 <sup>6-8</sup>     | ACI1 | 60                    | n.a.                                                       | 7                               | n.a.                              | n.a.                               | n.a.              | n.a.        | n.a.                                                | 7        | Persistent or recurrent symptoms, requiring cartilage revision surgery |
|                                        | MF   | 60                    | n.a.                                                       | 1                               | n.a.                              | n.a.                               | n.a.              | n.a.        | n.a.                                                | 10       |                                                                        |
| Gudas et al. 2012 <sup>9,10</sup>      | OCT  | 124.8                 | 0                                                          | n.a.                            | n.a.                              | 4                                  | 0                 | 7           | 5                                                   | 4        | Persistent or recurrent symptoms, requiring cartilage revision surgery |
|                                        | MF   | 124.8                 | 1                                                          | n.a.                            | n.a.                              | 10                                 | 0                 | 14          | 3                                                   | 11       |                                                                        |
| Lim et al. 2012 <sup>11</sup>          | MF   | 80.4                  | 3                                                          | n.a.                            | n.a.                              | n.a.                               | n.a.              | n.a.        | n.a.                                                | n.a.     | n.a.                                                                   |
|                                        | OCT  | 69.6                  | 1                                                          | n.a.                            | n.a.                              | n.a.                               | n.a.              | n.a.        | n.a.                                                | n.a.     |                                                                        |
|                                        | ACI1 | 62.4                  | 2                                                          | n.a.                            | n.a.                              | n.a.                               | n.a.              | n.a.        | n.a.                                                | n.a.     |                                                                        |
| Shive et al. 2015 <sup>12,13</sup>     | AMIC | 60                    | n.a.                                                       | n.a.                            | n.a.                              | n.a.                               | n.a.              | n.a.        | n.a.                                                | n.a.     | n.a.                                                                   |
|                                        | MF   | 60                    | n.a.                                                       | n.a.                            | n.a.                              | n.a.                               | n.a.              | n.a.        | n.a.                                                | n.a.     |                                                                        |
| Clavé et al. 2016 <sup>14</sup>        | ACI3 | 24                    | n.a.                                                       | n.a.                            | n.a.                              | n.a.                               | n.a.              | n.a.        | n.a.                                                | n.a.     | n.a.                                                                   |
|                                        | OCT  | 24                    | n.a.                                                       | n.a.                            | n.a.                              | n.a.                               | n.a.              | n.a.        | n.a.                                                | n.a.     |                                                                        |
| Knutsen et al. 2016 <sup>15-17</sup>   | ACI1 | 180                   | 10                                                         | 0                               | 10                                | 8                                  | 6                 | 10          | 4                                                   | 17       | Lack of healing requiring reoperation                                  |
|                                        | MF   | 180                   | 4                                                          | 0                               | 0                                 | 8                                  | 3                 | 7           | 4                                                   | 13       |                                                                        |
| Volz et al. 2017 <sup>18,19</sup>      | AMIC | 60                    | n.a.                                                       | n.a.                            | n.a.                              | 0                                  | 1                 | n.a.        | n.a.                                                | n.a.     | n.a.                                                                   |
|                                        | MF   | 60                    | n.a.                                                       | n.a.                            | n.a.                              | 1                                  | 0                 | n.a.        | n.a.                                                | n.a.     |                                                                        |
| Brittberg et al. 2018 <sup>20,21</sup> | ACI3 | 60                    | n.a.                                                       | n.a.                            | n.a.                              | 0                                  | n.a.              | n.a.        | n.a.                                                | 1        | n.a.                                                                   |
|                                        | MF   | 60                    | n.a.                                                       | n.a.                            | n.a.                              | 2                                  | n.a.              | n.a.        | n.a.                                                | 3        |                                                                        |
| Kane et al. 2018 <sup>*22,23</sup>     | ACI3 | 60                    | n.a.                                                       | n.a.                            | n.a.                              | n.a.                               | n.a.              | n.a.        | n.a.                                                | n.a.     | n.a.                                                                   |
|                                        | MF   | 60                    | n.a.                                                       | n.a.                            | n.a.                              | n.a.                               | n.a.              | n.a.        | n.a.                                                | n.a.     |                                                                        |
| Solheim et al. 2018 <sup>24</sup>      | OCT  | 192                   | n.a.                                                       | n.a.                            | n.a.                              | n.a.                               | 1                 | n.a.        | n.a.                                                | n.a.     | n.a.                                                                   |
|                                        | MF   | 192                   | n.a.                                                       | n.a.                            | n.a.                              | n.a.                               | 3                 | n.a.        | n.a.                                                | n.a.     |                                                                        |
| Barić et al.                           | ACI3 | 115.2                 | n.a.                                                       | 1                               | 0                                 | 3                                  | n.a.              | 3           | 0                                                   | n.a.     | Cartilage revision surgery                                             |

|                                       |           |       |      |      |      |      |      |      |      |      |                                                            |
|---------------------------------------|-----------|-------|------|------|------|------|------|------|------|------|------------------------------------------------------------|
| 2020 <sup>25,26</sup>                 | ACI1      | 103.2 | n.a. | 1    | 1    | 2    | n.a. | 1    | 0    | n.a. |                                                            |
| Glasbrenner et al. 2020 <sup>27</sup> | AMIC      | 27    | n.a.                                                       |
|                                       | MF        | 27    | n.a. | 1    | n.a. | n.a. | n.a. | n.a. | n.a. | n.a. |                                                            |
| Ibarra et al. 2021 <sup>28</sup>      | ACI3      | 74    | n.a. | 0    | Reoperation                                                |
|                                       | MF        | 71    | n.a. | 2    | n.a. | n.a. | n.a. | n.a. | n.a. | 2    |                                                            |
| Hoburg et al. 2022 <sup>29-31</sup>   | spheroids | 60    | n.a. | n.a. | 0    | n.a. | n.a. | n.a. | n.a. | 0    | Cartilage injury and persistent pain requiring reoperation |
|                                       | MF        | 60    | n.a. | n.a. | 0    | n.a. | n.a. | n.a. | n.a. | 4    |                                                            |

Legend:

ACI1: autologous chondrocyte implantation, 1<sup>st</sup> generation.

ACI2: autologous chondrocyte implantation, 2<sup>nd</sup> generation.

ACI3: autologous chondrocyte implantation, 3<sup>rd</sup> generation.

AMIC: autologous matrix-induced chondrogenesis.

MF: microfracture.

n.a.: not available.

OCT: osteochondral transplantation.

Spheroids: chondrospheres (Co.don, produced according to the self-aggregation technique).

When multiple publications are available for the same trial, we have written the author and date of publication of the most recent one and in apex the references of all available publications.

Data describes patients affected by the considered adverse events for each trial arm.

\*: knee osteoarthritis conservatively and surgically treated.

## Appendix A6: Follow-Up Duration

| STUDY                                     | ARMS | MEAN FOLLOW-UP months |
|-------------------------------------------|------|-----------------------|
| Horas et al.<br>2003 <sup>1</sup>         | ACI1 | 24                    |
|                                           | OCT  | 24                    |
| Schneider<br>et al. 2003 <sup>2</sup>     | ACI3 | 6                     |
|                                           | ACI1 | 6                     |
| Dozin et al.<br>2005 <sup>3</sup>         | ACI1 | 36                    |
|                                           | OCT  | 36                    |
| Gooding et al.<br>2006 <sup>4</sup>       | ACI2 | 24                    |
|                                           | ACI1 | 24                    |
| Basad et al.<br>2010 <sup>5</sup>         | ACI3 | 24                    |
|                                           | MF   | 24                    |
| Vanlauwe et<br>al. 2011 <sup>6-8</sup>    | ACI1 | 60                    |
|                                           | MF   | 60                    |
| Gudas et al.<br>2012 <sup>9,10</sup>      | OCT  | 124.8                 |
|                                           | MF   | 124.8                 |
| Lim et al.<br>2012 <sup>11</sup>          | MF   | 80.4                  |
|                                           | OCT  | 69.6                  |
|                                           | ACI1 | 62.4                  |
| Shive et al.<br>2015 <sup>12,13</sup>     | AMIC | 60                    |
|                                           | MF   | 60                    |
| Clavé et al.<br>2016 <sup>14</sup>        | ACI3 | 24                    |
|                                           | OCT  | 24                    |
| Knutsen et<br>al. 2016 <sup>15-17</sup>   | ACI1 | 180                   |
|                                           | MF   | 180                   |
| Volz et al.<br>2017 <sup>18,19</sup>      | AMIC | 60                    |
|                                           | MF   | 60                    |
| Brittberg et<br>al. 2018 <sup>20,21</sup> | ACI3 | 60                    |
|                                           | MF   | 60                    |
| Kane et al.<br>2018 <sup>22,23</sup>      | ACI3 | 60                    |
|                                           | MF   | 60                    |
| Solheim et                                | OCT  | 192                   |

|                                          |                                                                                           |       |
|------------------------------------------|-------------------------------------------------------------------------------------------|-------|
| al. 2018 <sup>24</sup>                   | MF                                                                                        | 192   |
| Barié et al.<br>2020 <sup>25,26</sup>    | ACI3                                                                                      | 115.2 |
|                                          | ACI1                                                                                      | 103.2 |
| Glasbrenner<br>et al. 2020 <sup>27</sup> | AMIC                                                                                      | 27    |
|                                          | MF                                                                                        | 27    |
| Ibarra et al.<br>2021 <sup>28</sup>      | ACI3                                                                                      | 74    |
|                                          | MF                                                                                        | 71    |
| Hoburg et<br>al. 2022 <sup>29,31</sup>   | spheroids                                                                                 | 60    |
|                                          | MF                                                                                        | 60    |
| <b>MEAN FOLLOW-UP PER TRIAL ARM</b>      | MF: 79.6<br>AMIC: 49<br>OCT:78.4<br>ACI1: 61.9<br>ACI2: 24<br>ACI3: 51.9<br>SPHEROIDS: 60 |       |
| <b>MEAN FOLLOW-UP</b>                    | 57.8                                                                                      |       |

When multiple publications are available for the same trial, we have written the author and date of publication of the most recent one and in apex the references of all available publications.

## Appendix A7: Functional scores

|                                        | KOOS         | LYSHOLM      | TEGNER       | IKDC         | HSS          | MODIFIED CINCINNATI | WOMAC       |
|----------------------------------------|--------------|--------------|--------------|--------------|--------------|---------------------|-------------|
| Horas et al. 2003 <sup>1</sup>         |              | X            | X            |              |              |                     |             |
| Schneider et al. 2003 <sup>2</sup>     |              |              |              | X            |              |                     |             |
| Dozin et al. 2005 <sup>3</sup>         |              | X            |              |              |              |                     |             |
| Gooding et al. 2006 <sup>4</sup>       |              |              |              |              |              | X                   |             |
| Basad et al. 2010 <sup>5</sup>         |              | X            | X            |              |              |                     |             |
| Vanlauwe et al. 2011 <sup>6-8</sup>    | X            |              |              |              |              |                     |             |
| Gudas et al. 2012 <sup>9,10</sup>      |              |              |              | X            | X            |                     |             |
| Lim et al. 2012 <sup>11</sup>          |              | X            | X            |              | X            |                     |             |
| Shive et al. 2015 <sup>12,13</sup>     |              |              |              |              |              |                     | X           |
| Clavé et al. 2016 <sup>14</sup>        |              |              |              | X            |              |                     |             |
| Knutsen et al. 2016 <sup>15-17</sup>   |              | X            |              |              |              |                     |             |
| Volz et al. 2017 <sup>18,19</sup>      |              |              |              |              |              | X                   |             |
| Brittberg et al. 2018 <sup>20,21</sup> | X            |              |              | X            |              | X                   |             |
| Kane et al. 2018 <sup>22,23</sup>      | X            |              |              | X            |              |                     |             |
| Solheim et al. 2018 <sup>24</sup>      | X            |              |              |              |              |                     |             |
| Barié et al. 2020 <sup>25,26</sup>     |              | X            | X            | X            |              |                     |             |
| Glasbrenner et al. 2020 <sup>27</sup>  | X            |              |              | X            |              |                     |             |
| Ibarra et al. 2021 <sup>28</sup>       | X            | X            | X            | X            |              |                     |             |
| Hoburg et al. 2022 <sup>29-31</sup>    | X            |              |              | X            |              |                     |             |
| OVERALL                                | 7/19 (36.8%) | 7/19 (36.8%) | 5/19 (26.3%) | 9/19 (47.3%) | 2/19 (10.5%) | 3/19 (15.8%)        | 1/19 (5.2%) |

When multiple publications are available for the same trial, we have written the author and date of publication of the most recent one and in apex the references of all available publications.

# SECTION B

## Appendix B1: Net-plots for the clinical scores

|         | Short-term | Mid-term | Long-term |
|---------|------------|----------|-----------|
| KOOS    |            |          |           |
| Lysholm |            |          |           |
| Tegner  |            |          |           |

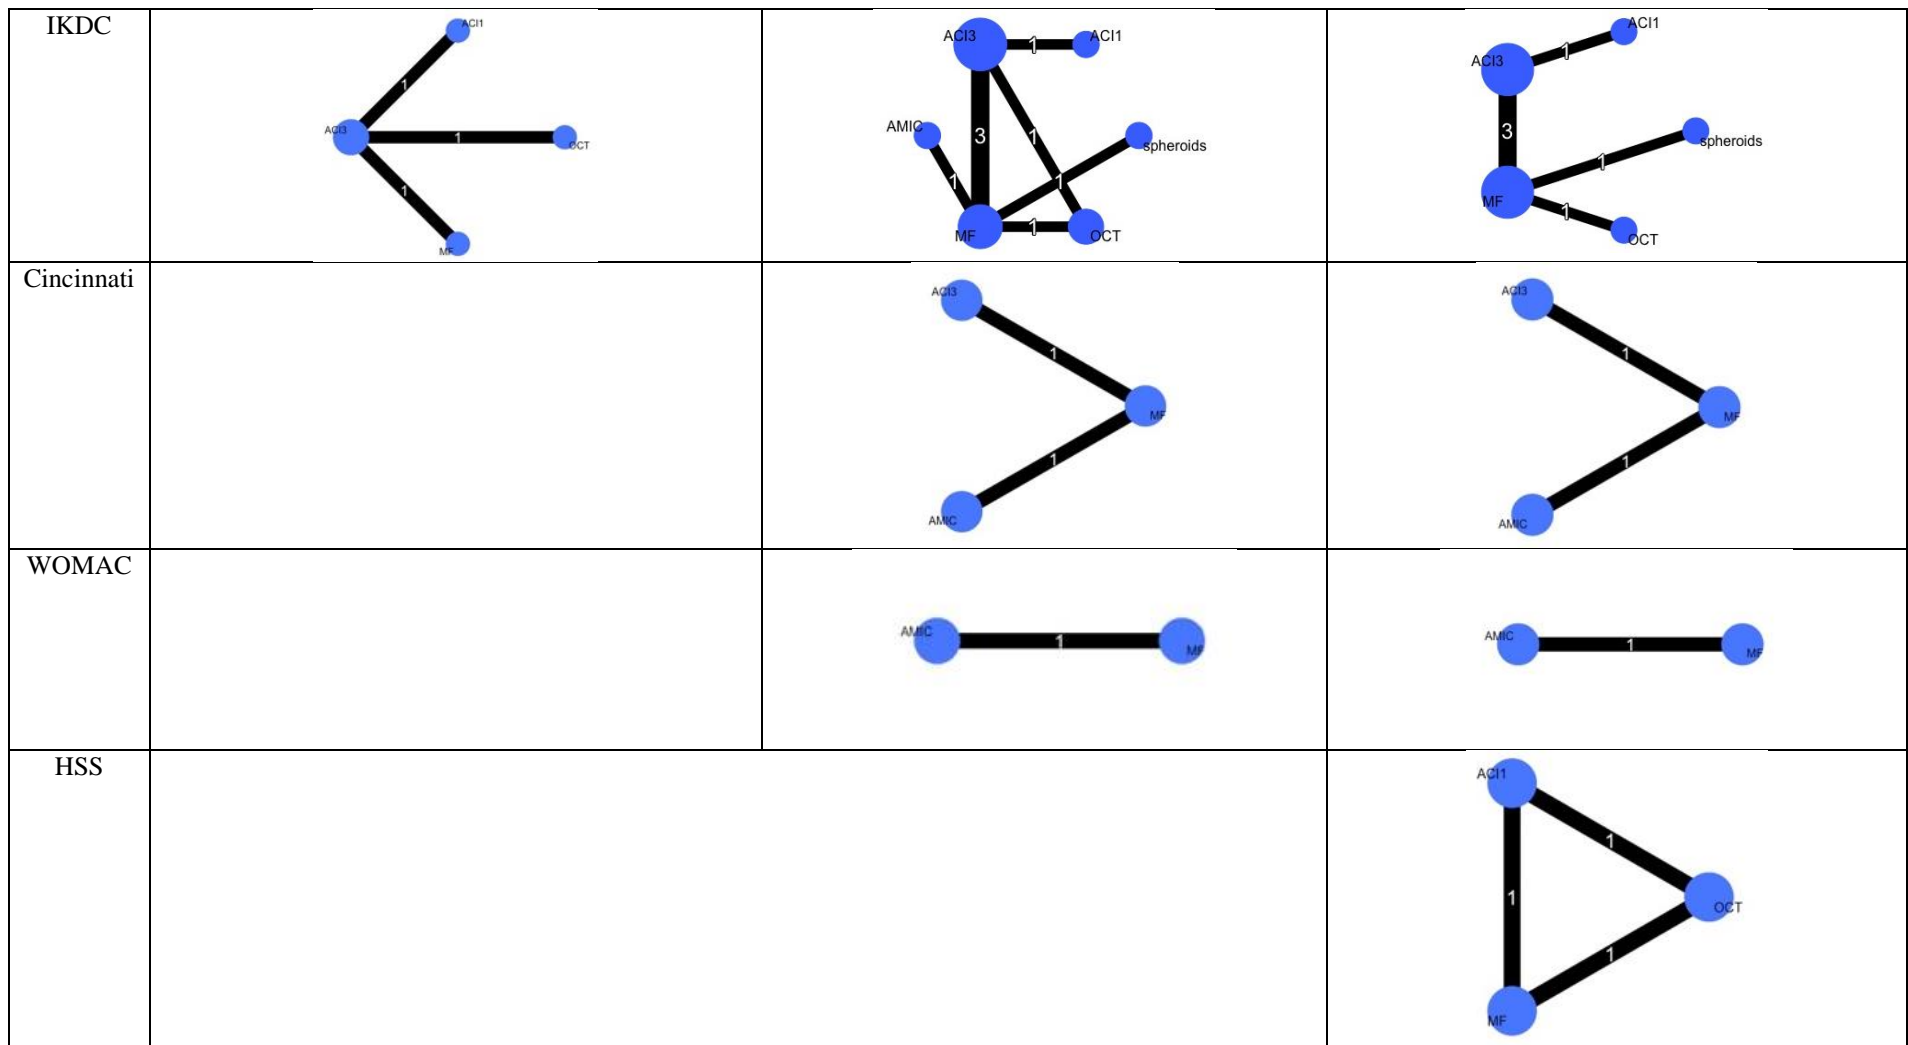

Network diagrams showing the direct comparisons (lines) among treatments (nodes). The size of the nodes is proportional to the sample size of each treatment. The thickness of the lines is proportional to the number of available studies, indicated by the white number.





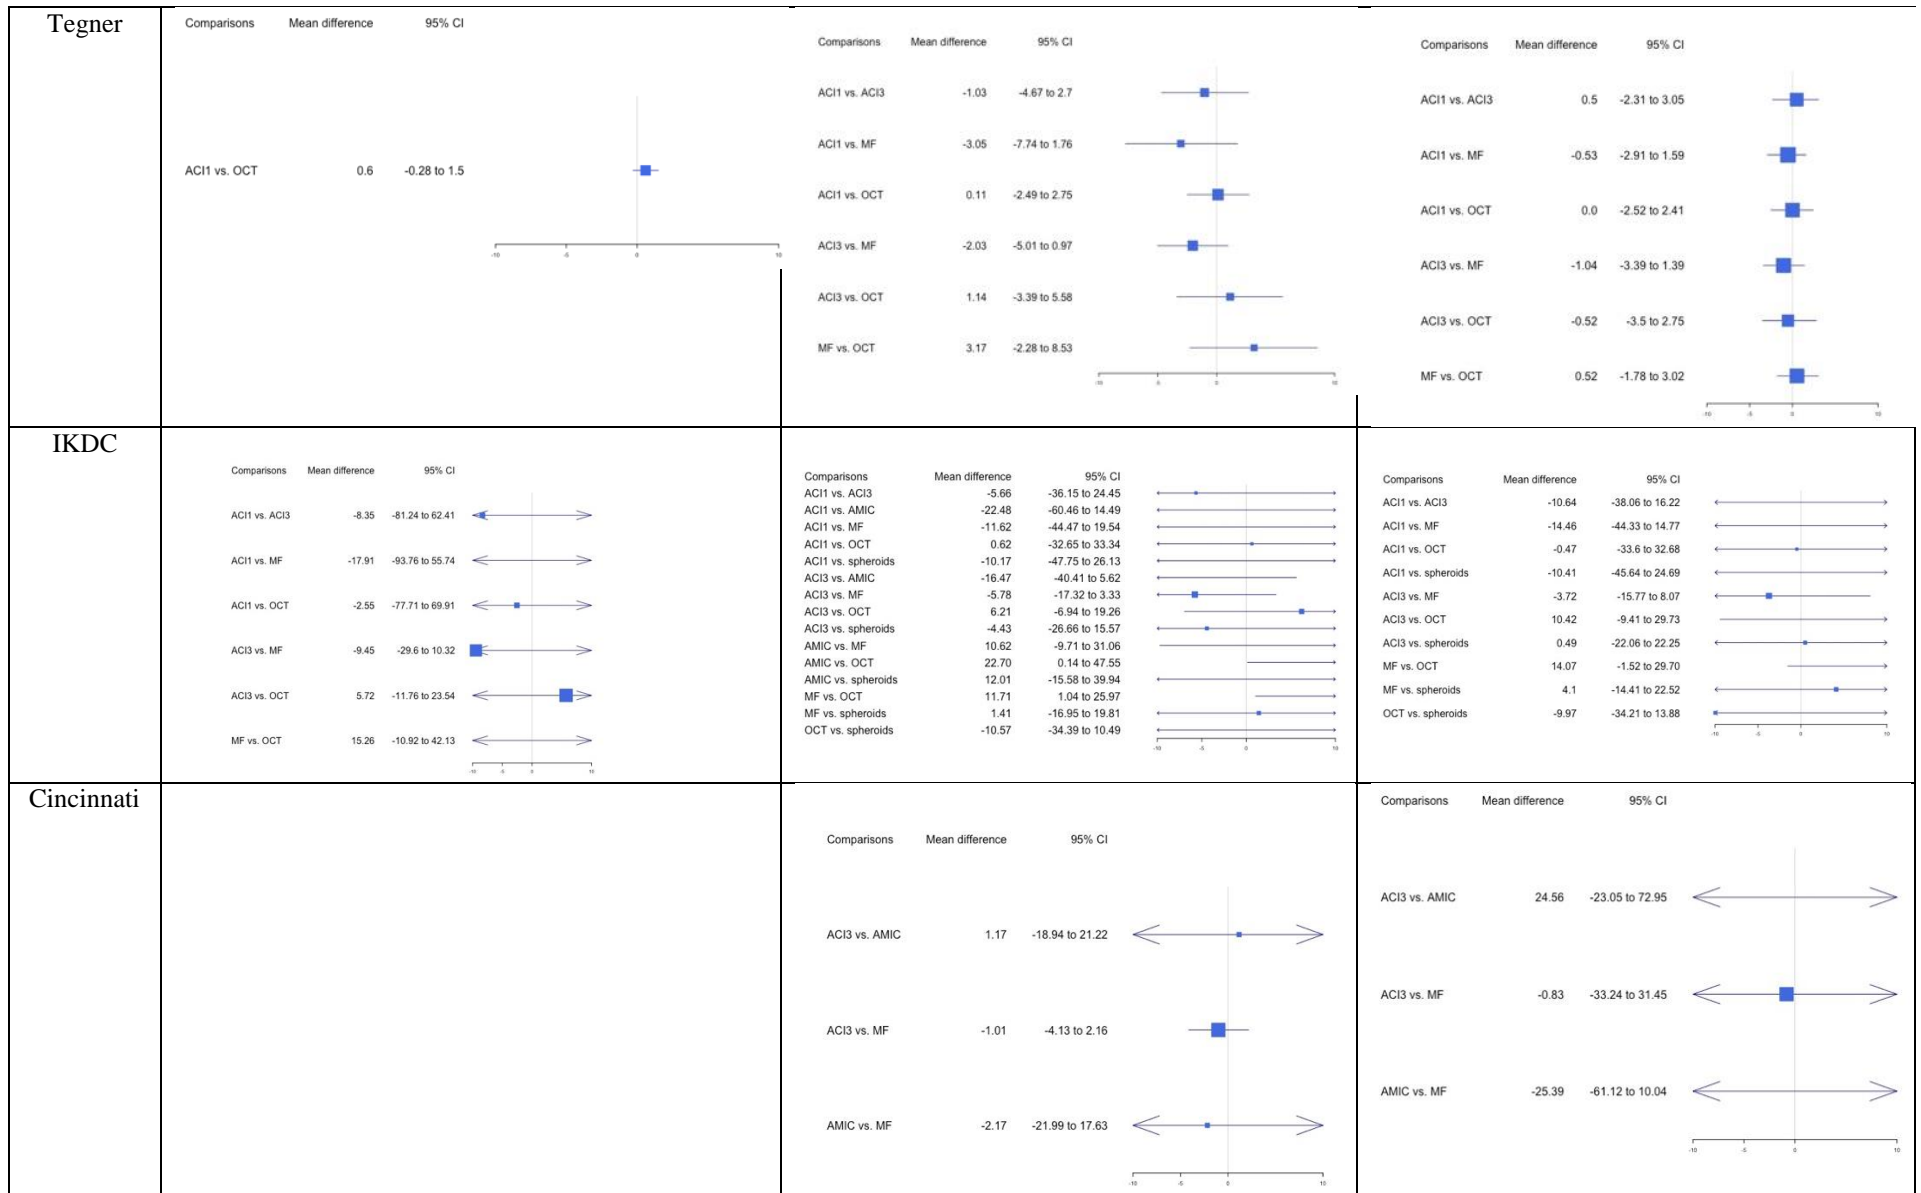

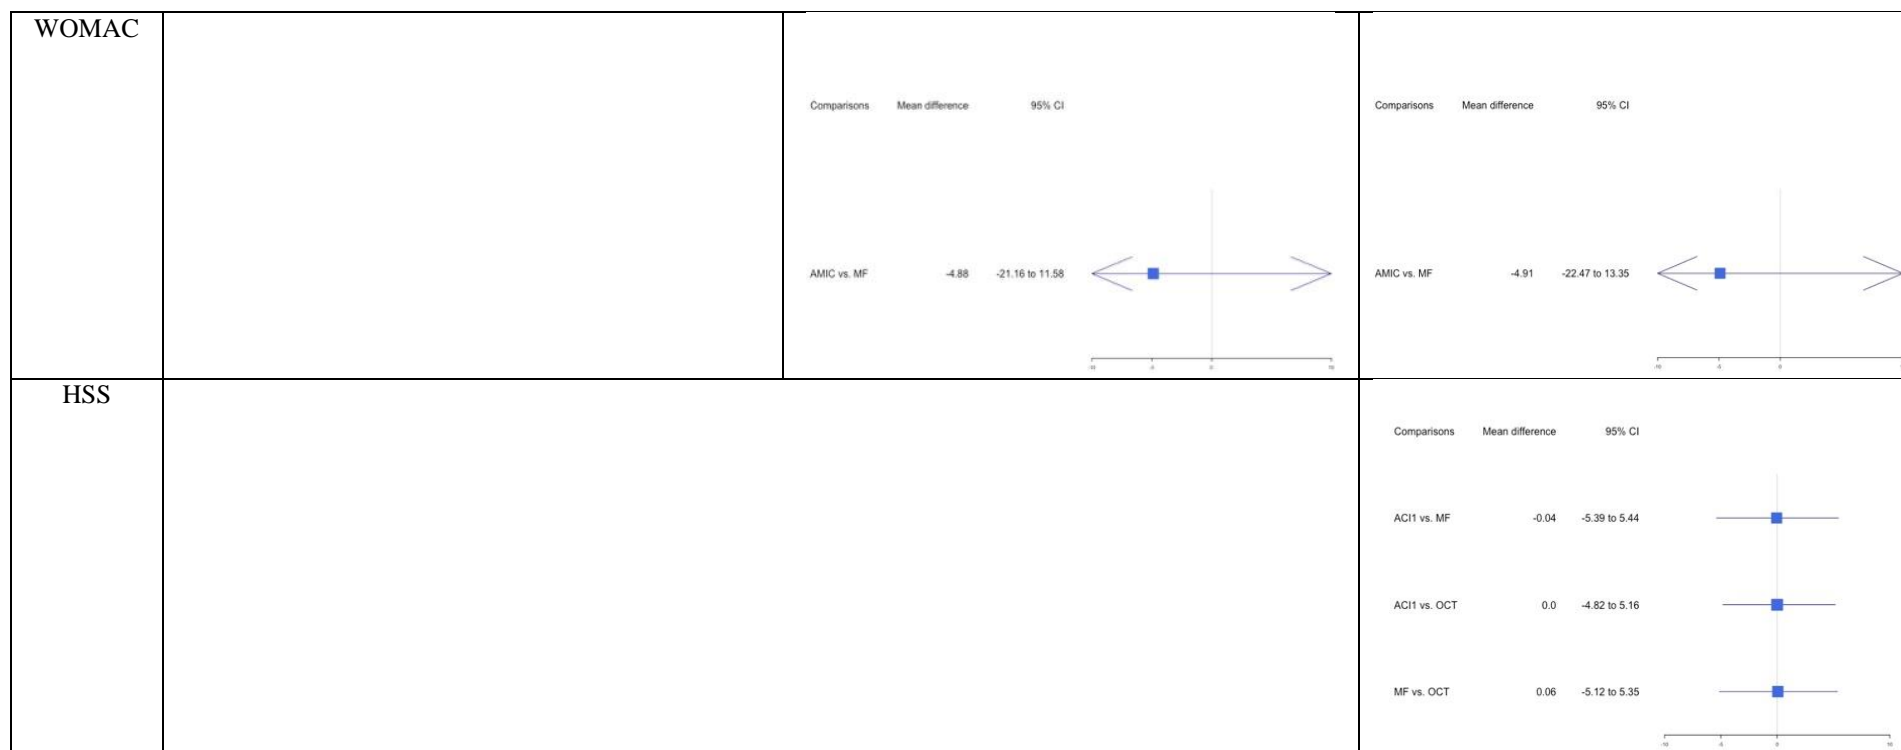

There were no available studies using Lysholm at short-term.

In forest plots, no difference for the mean differences corresponds to 0.

The I2 for KOOS: at short-term 25%, mid-term 8%, long-term 10%.

The I2 for Lysholm: at mid-term 16%, long-term 15%.

The I2 for Tegner: at short-term 50%, mid-term 17%, long-term 18%.

The I2 for IKDC: at short-term 16%, mid-term 2%, long-term 2%.

The I2 for Cincinnati: at mid-term 22%, long-term 25%.

The I2 for WOMAC: at mid-term 49%, long-term 50%.

The I2 for HSS: at long-term 30%.

# Appendix B3: Rankogram for the clinical scores

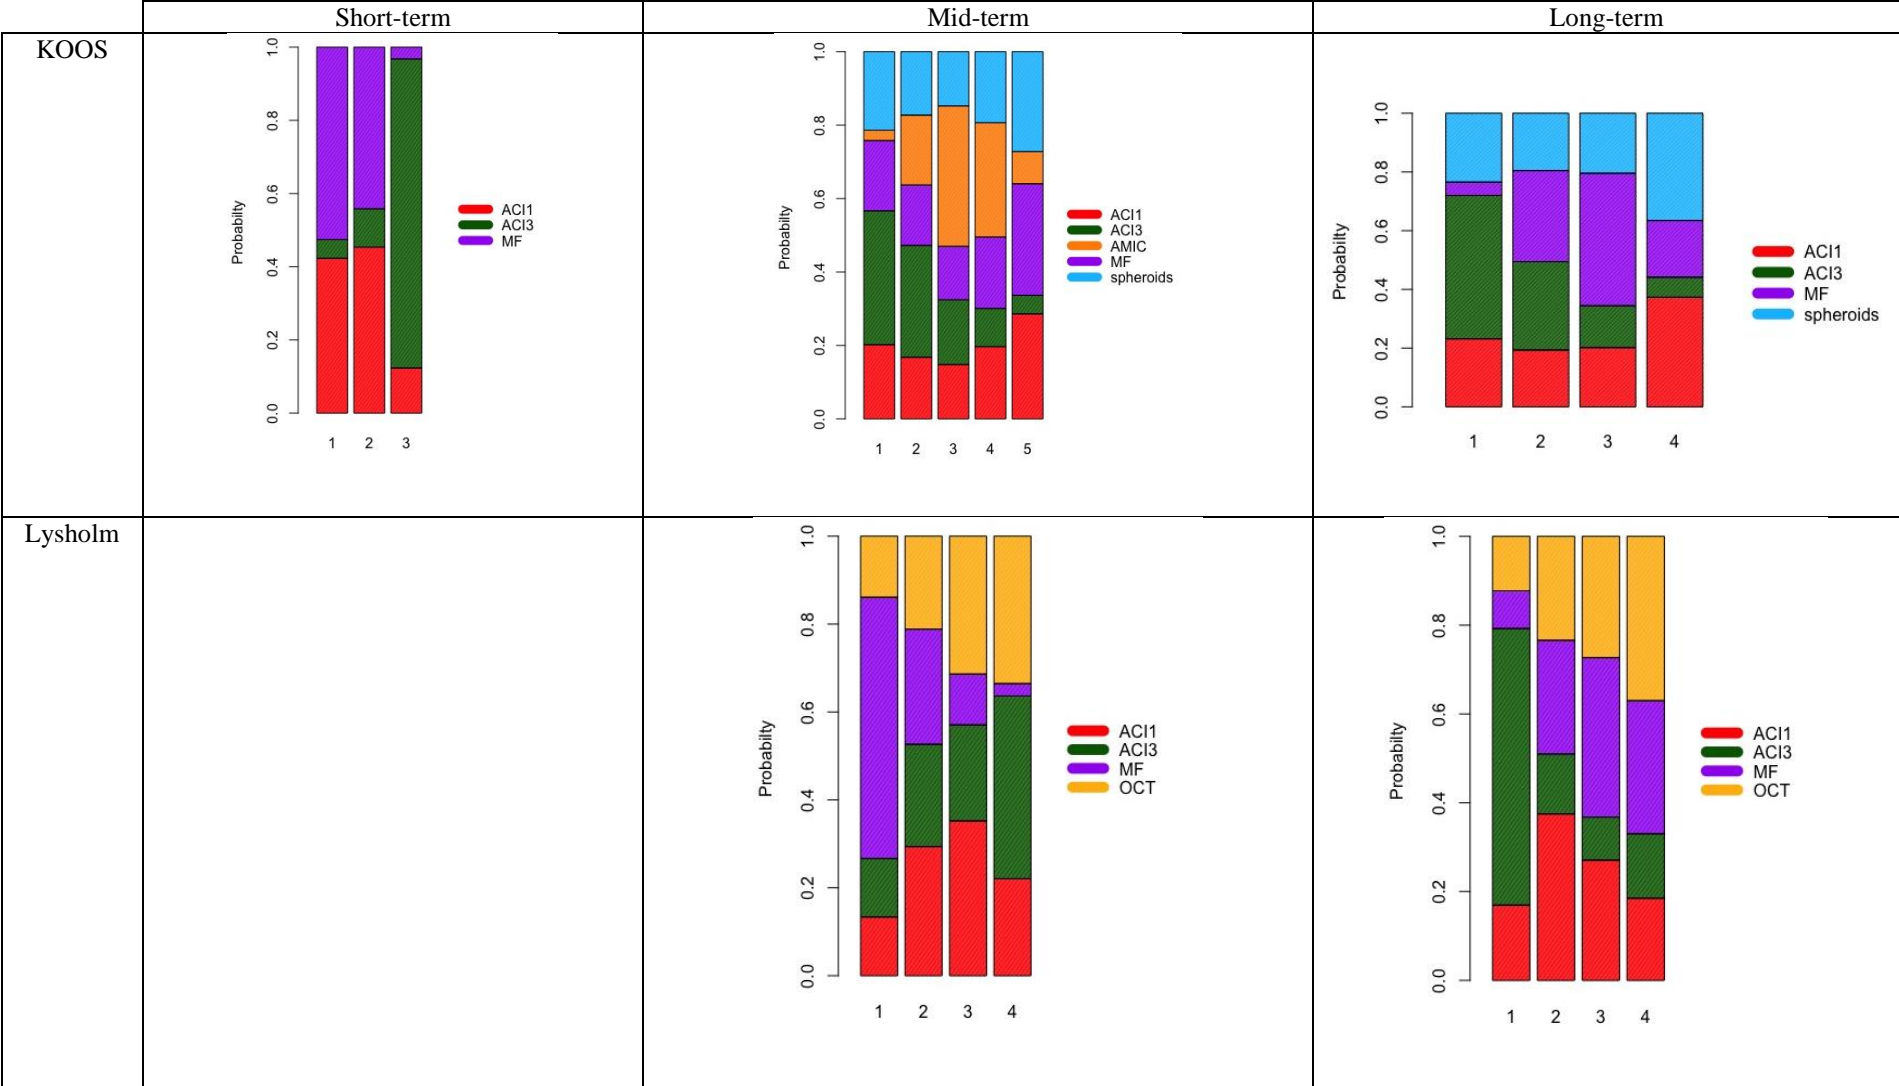

Tegner

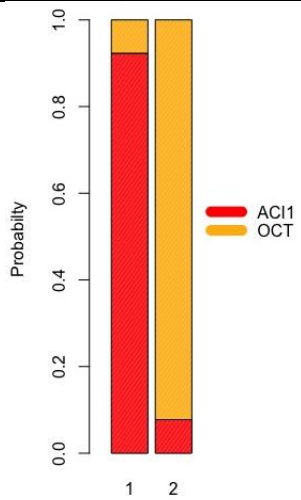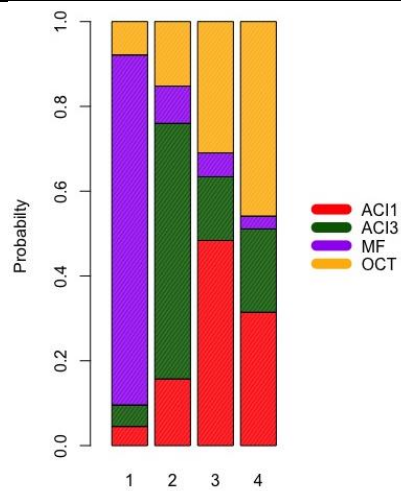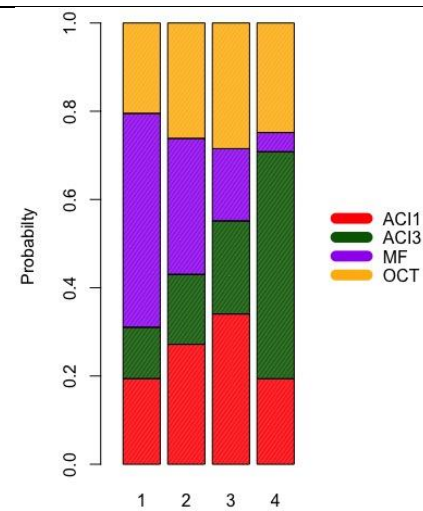

IKDC

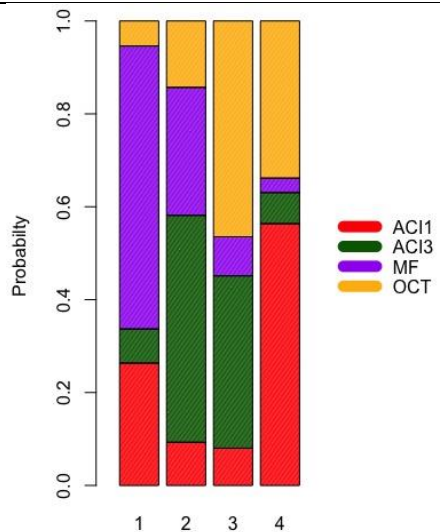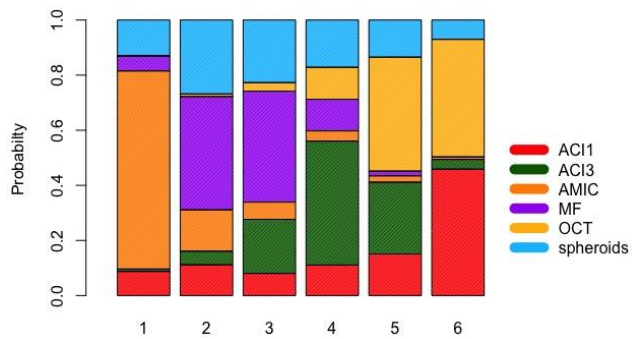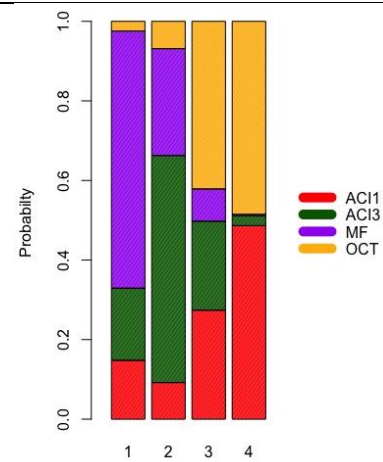

Cincinnati

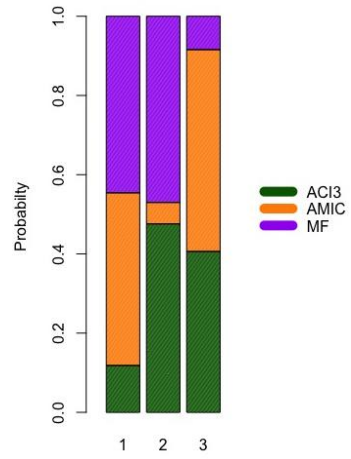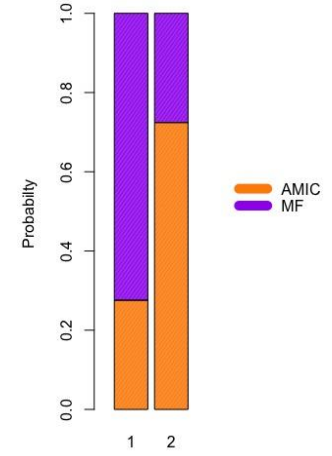

WOMAC

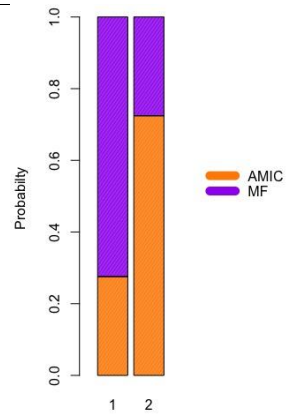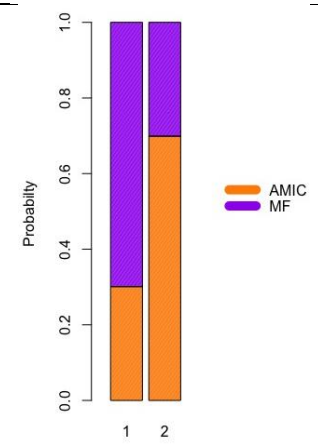

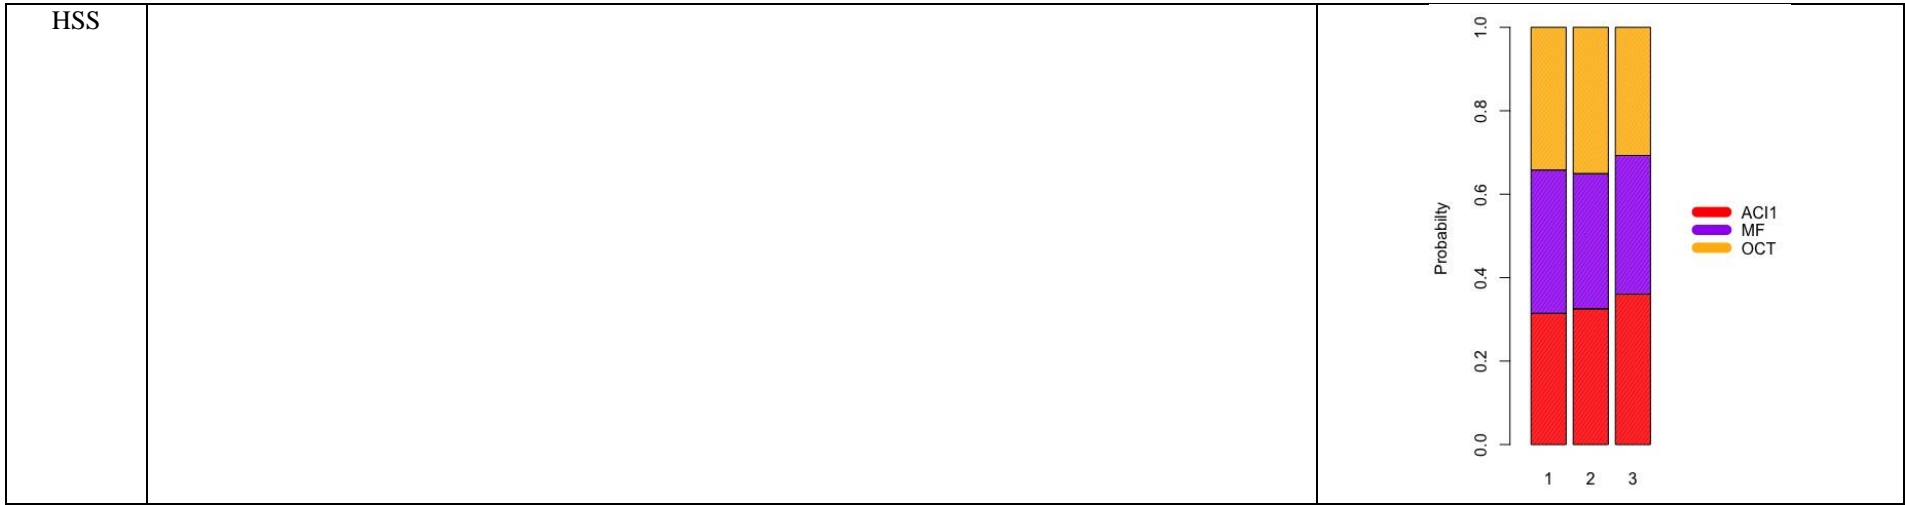

The ranking diagrams were generated for each outcome using the surface under the cumulative ranking curve (SUCRA) and mean ranks.

## Appendix B4: Net-plots for the adverse events

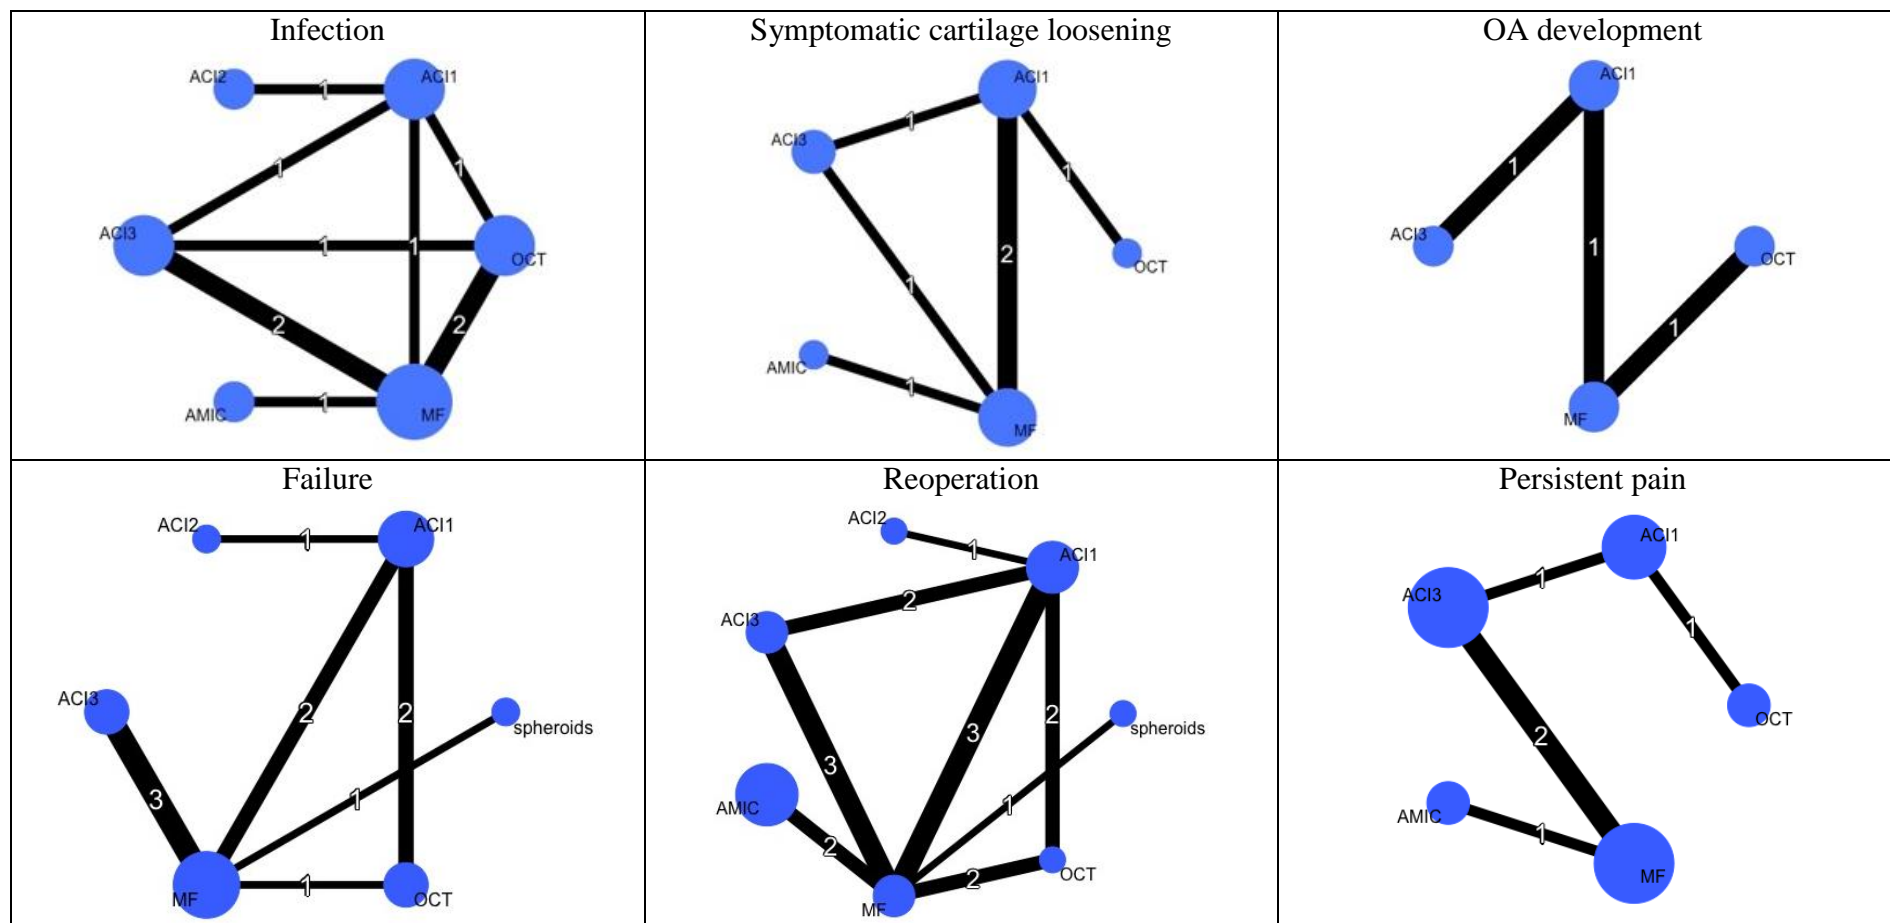

Network diagrams showing the direct comparisons (lines) among treatments (nodes). The size of the nodes is proportional to the sample size of each treatment. The thickness of the lines is proportional to the number of available studies, indicated by the white number.



## Appendix B5: Forest plots for the adverse events

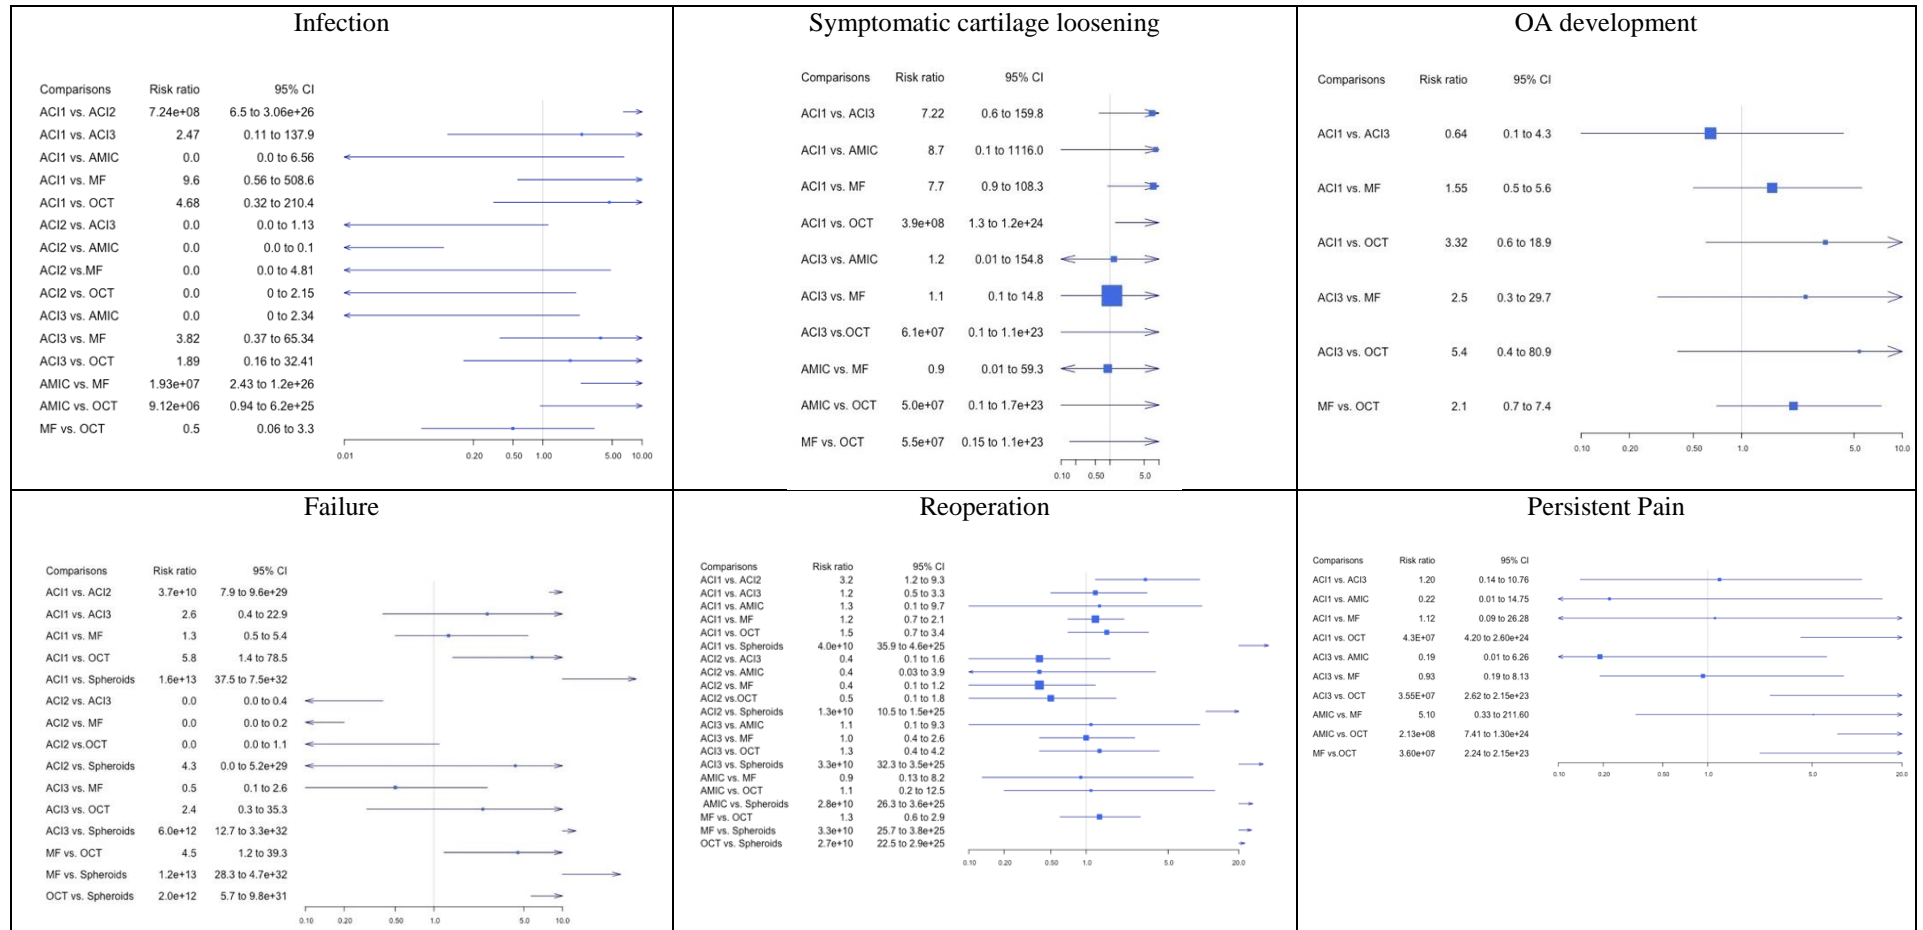

In forest plots, no difference for the relative risk corresponds to 1.

The I2 for: infection was 23%, symptomatic cartilage loosening was 29%, for osteoarthritis development was 17%, for failure, reoperation and persistent pain was 0%.

## Appendix B6: Rankogram for the adverse events

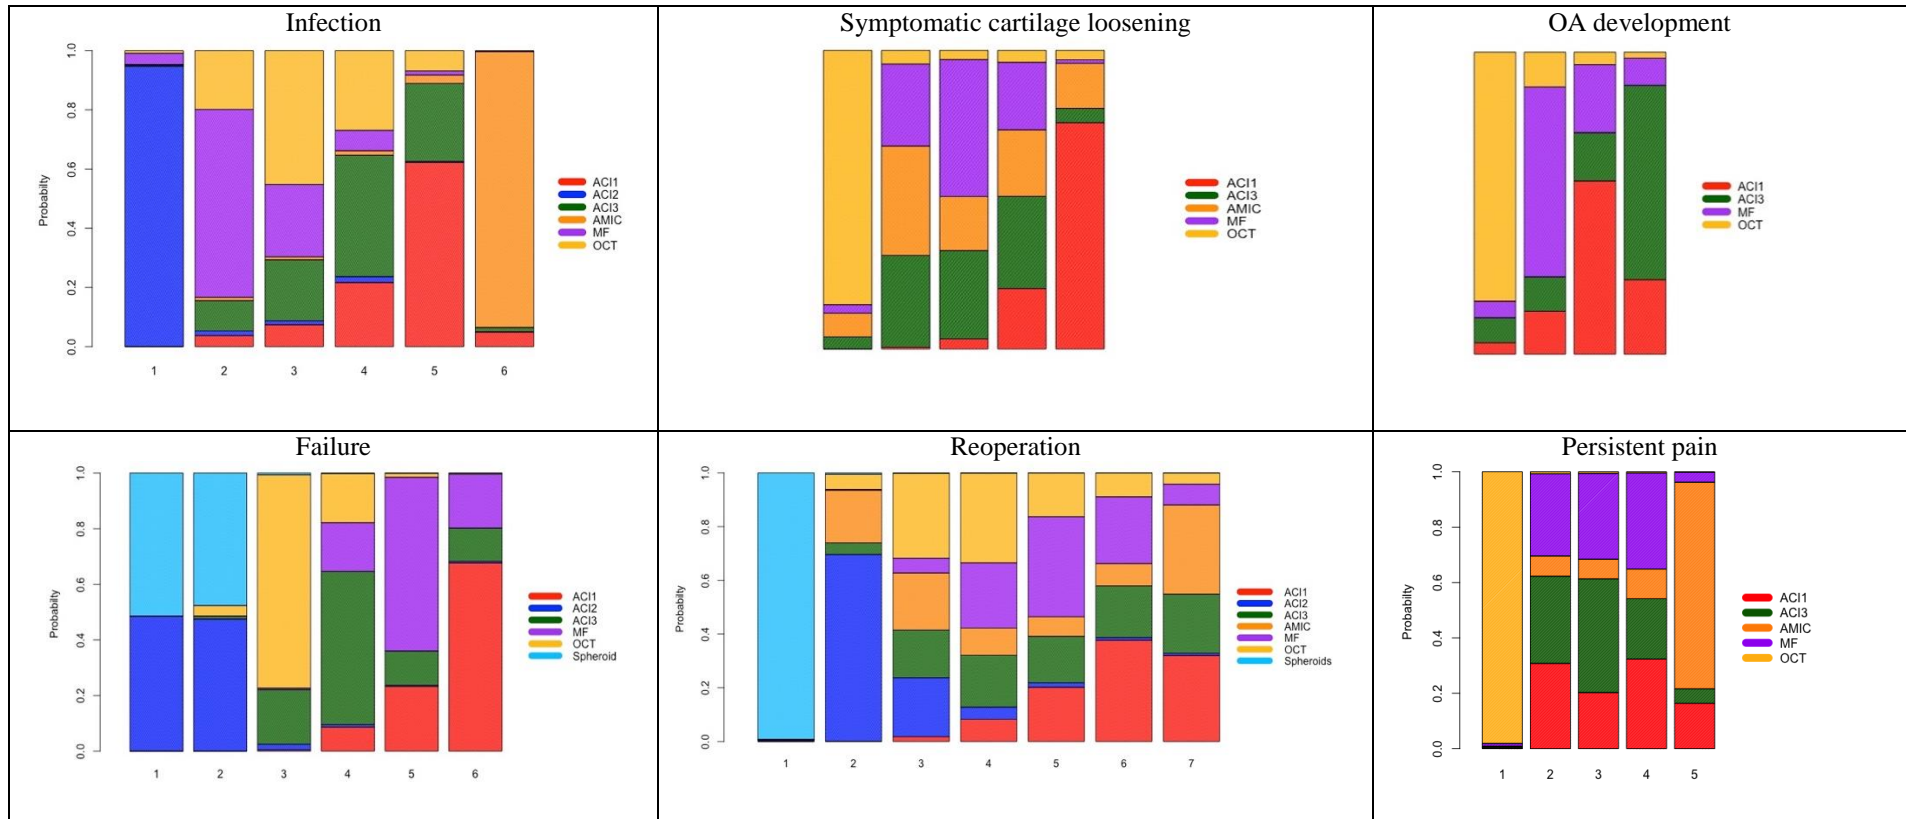

The ranking diagrams were generated for each outcome using the surface under the cumulative ranking curve (SUCRA) and mean ranks.

## Appendix B7: Forest plots of the subgroup analysis, for the clinical scores

IKDC

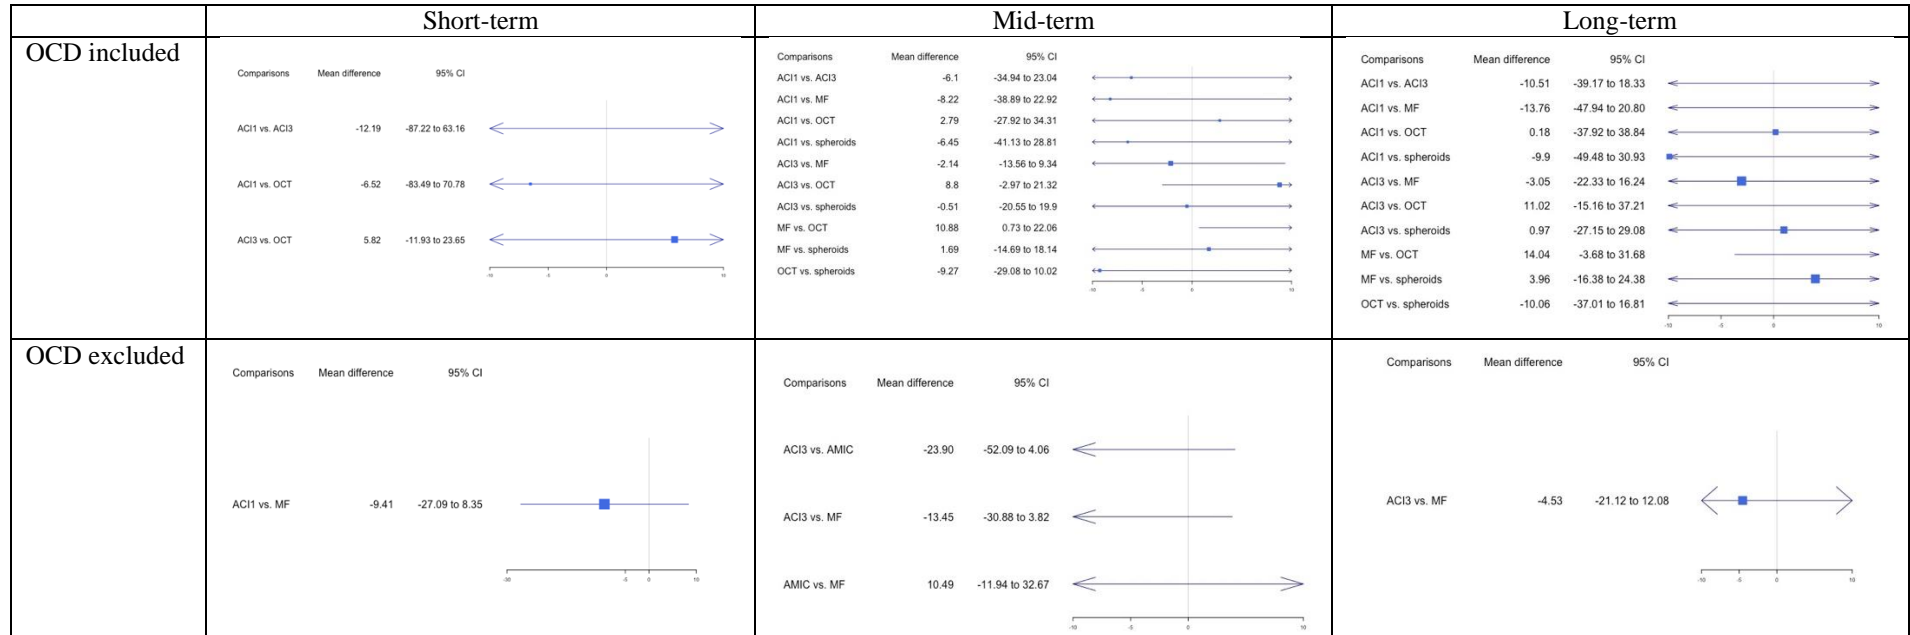

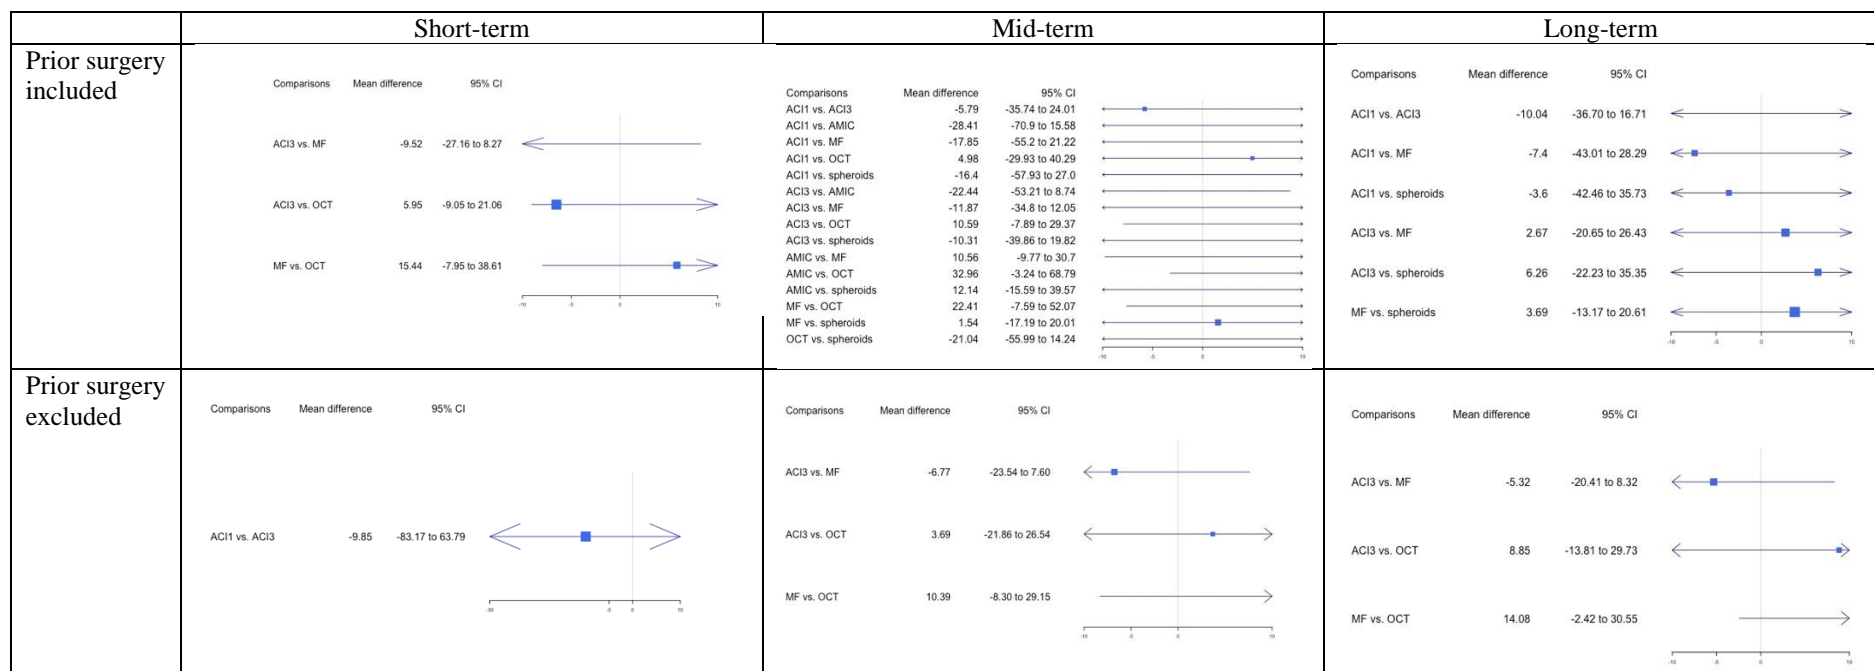

In forest plots, no difference for the mean differences corresponds to 0.

## Appendix B8: Forest plots of the subgroup analysis, for the adverse events

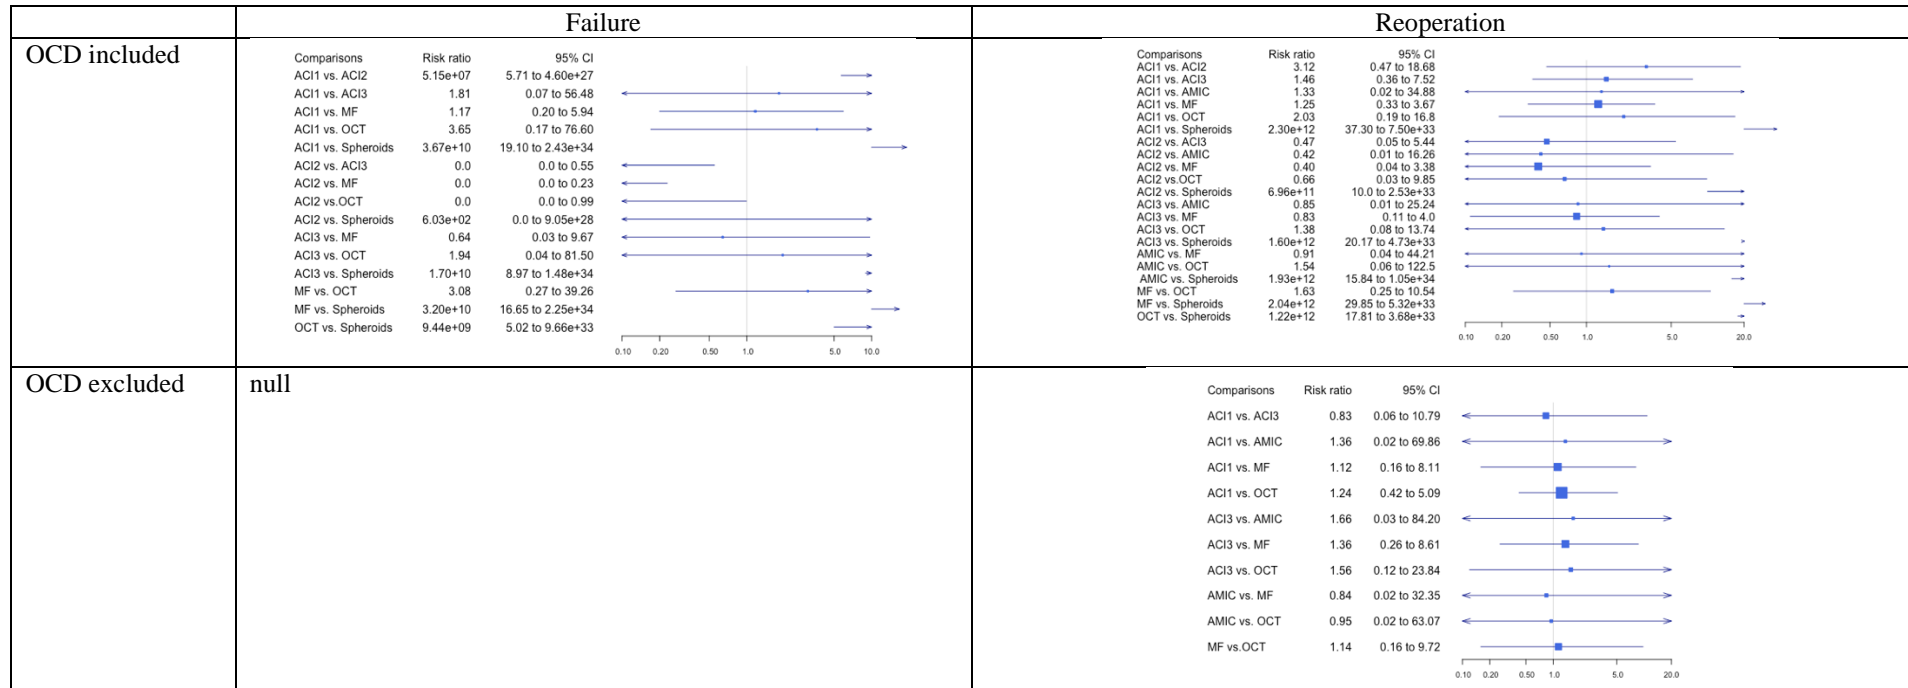

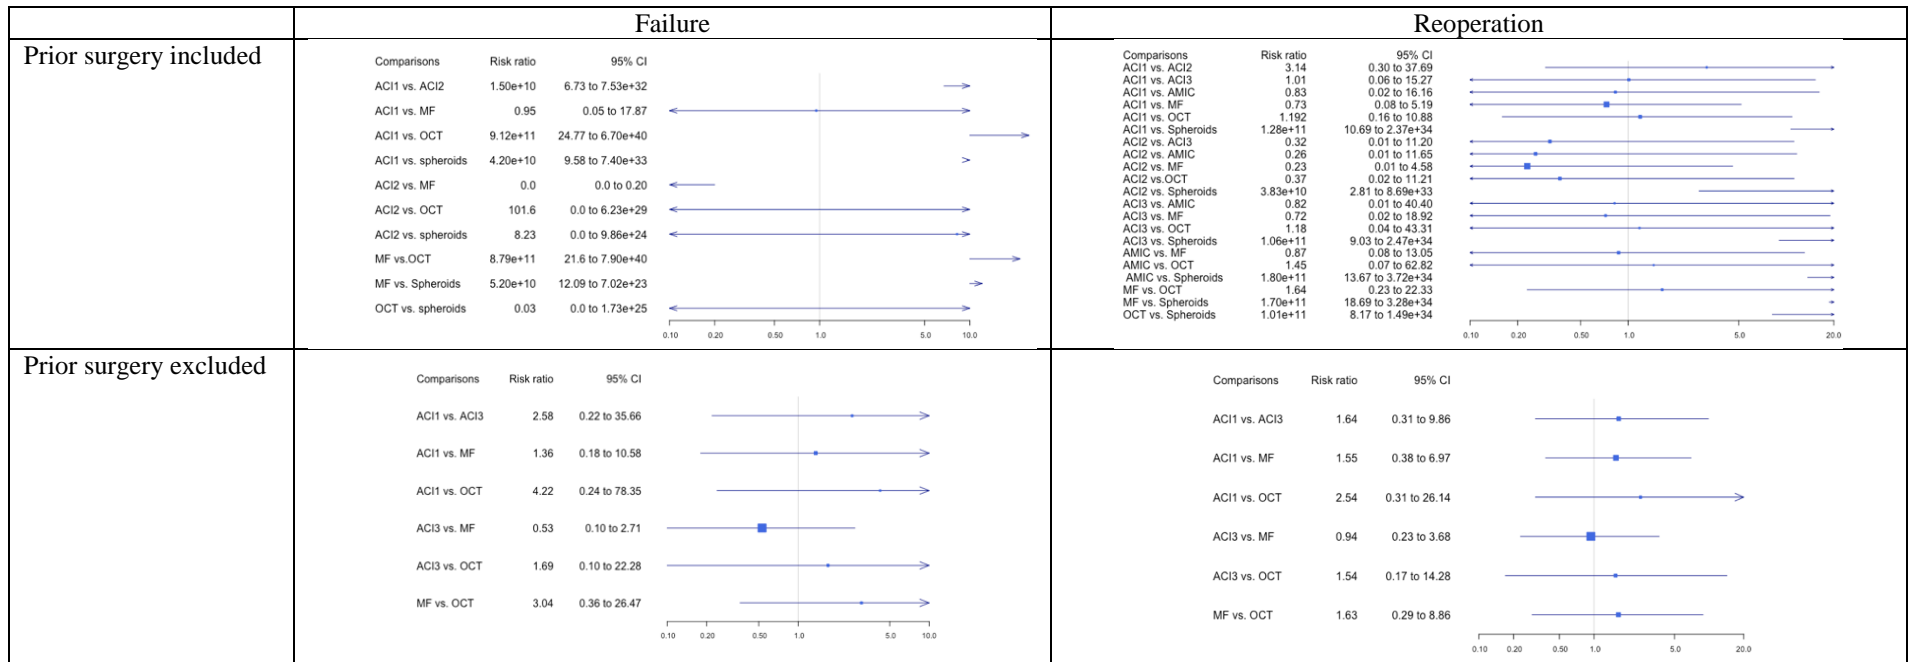

In forest plots, no difference for the relative risk corresponds to 1.

## Appendix B9: Funnel plots

For primary outcomes

Funnel plot IKDC short term

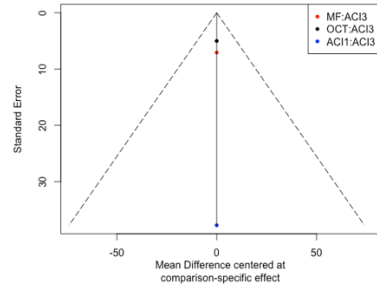

Funnel plot IKDC mid term

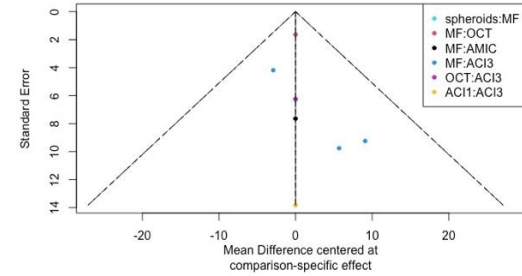

Funnel plot IKDC long term

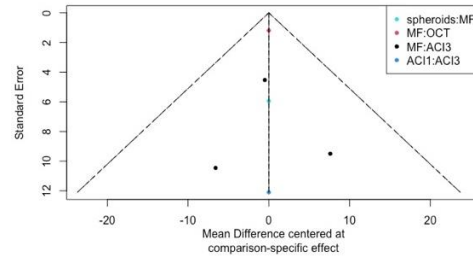

For secondary outcomes

Funnel plot reoperation rate

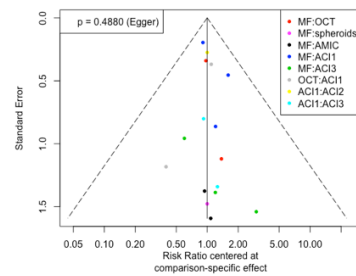

Funnel plot failure rate

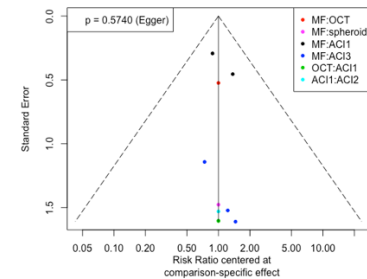

# SECTION C

## Appendix C1: Risk of bias assessment

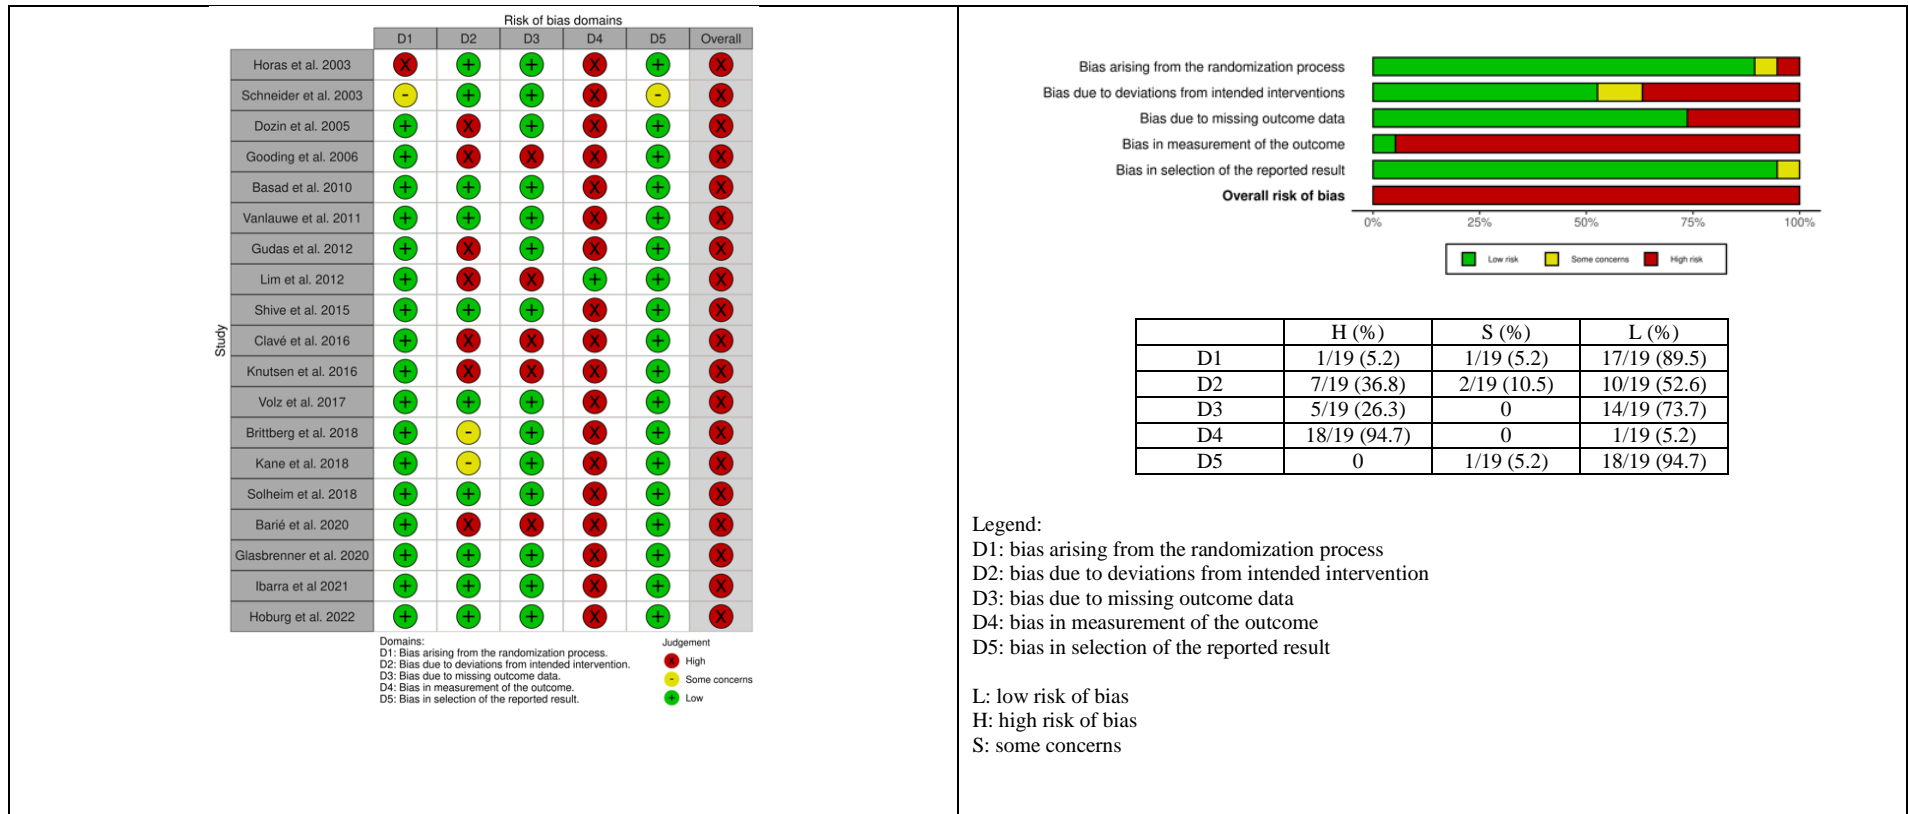



# Appendix C2: GRADE

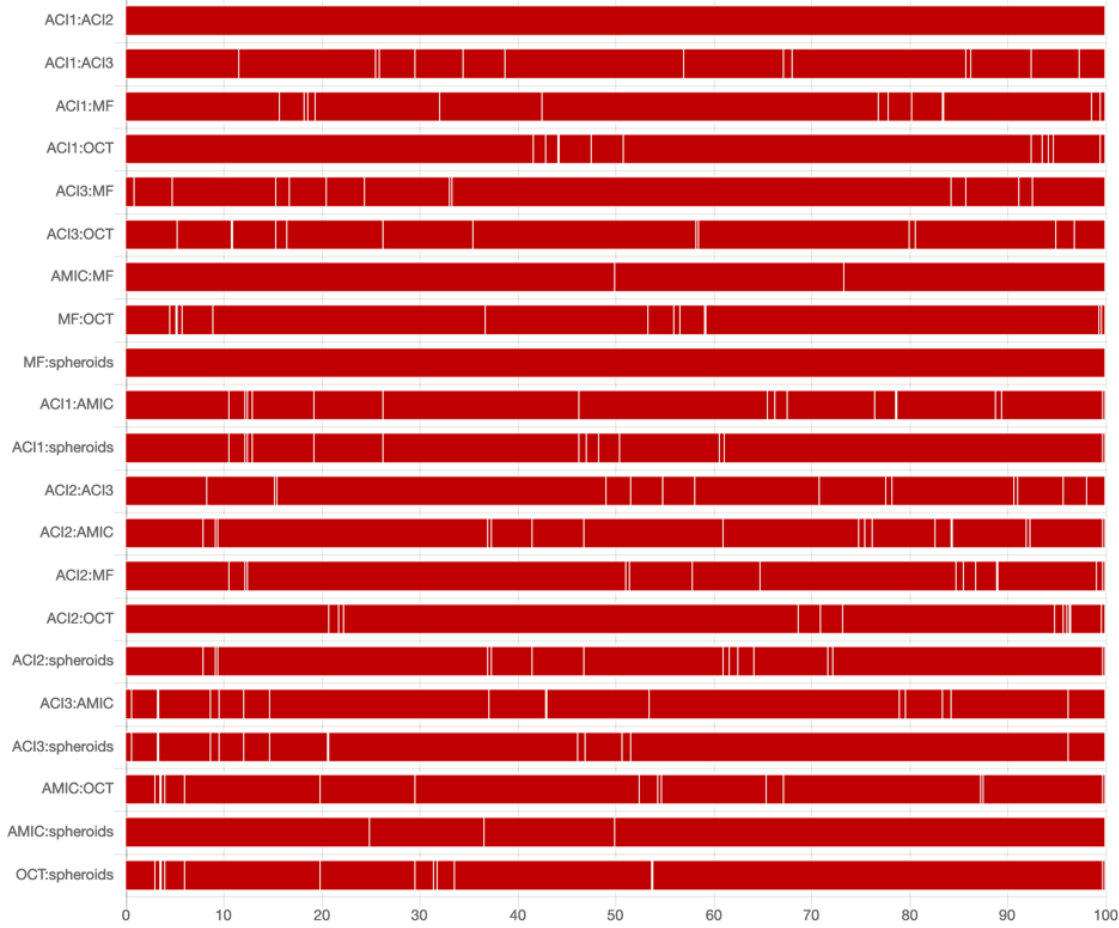

## Appendix C3: Pairwise comparison and transitivity

KOOS mid term:

| Comparaisons                           | MF<br>Vs<br>ACI1  | MF<br>Vs<br>ACI3         | MF<br>Vs<br>AMIC      | Spheroids<br>Vs<br>MF |
|----------------------------------------|-------------------|--------------------------|-----------------------|-----------------------|
| Trials included/total available trials | 3/3               | 1/4                      | 1/3                   | 1/1                   |
| Patient included in meta-analysis      | 88                | 195                      | 24                    | 97                    |
| MD [95% CI]                            | 6.6 [-0.42 ;14.0] | -89.0<br>[-330.0 ;150.0] | 15.0<br>[-21.0 ;51.0] | -2.0<br>[-11.0 ;7.0]  |
| I <sup>2</sup>                         | -                 | 100.0%                   | -                     | -                     |

KOOS long term :

| Comparaisons                           | MF<br>Vs<br>ACI1  | MF<br>Vs<br>ACI3         | MF<br>Vs<br>Spheroids   |
|----------------------------------------|-------------------|--------------------------|-------------------------|
| Trials included/total available trials | 1/3               | 3/4                      | 1/1                     |
| Patient included in meta-analysis      | 77                | 178                      | 97                      |
| MD [95% CI]                            | 7.1 [-0.39 ;15.0] | -98.0<br>[-330.0 ;140.0] | -5.2<br>[-410.0 ;410.0] |
| I <sup>2</sup>                         | -                 | 100.0%                   | -                       |

Lysholm mid term :

| Comparaisons                           | ACI3<br>Vs<br>ACI1 | MF<br>Vs<br>ACI1 | OCT<br>Vs<br>ACI1 | MF<br>Vs<br>ACI3 | OCT<br>Vs<br>MF |
|----------------------------------------|--------------------|------------------|-------------------|------------------|-----------------|
| Trials included/total available trials | 1/2                | 1/3              | 1/3               | 2/4              | 1/3             |
| Patient included in meta-analysis      | 21                 | 80               | 40                | 84               | 40              |

|                |                    |                      |                     |                      |                       |
|----------------|--------------------|----------------------|---------------------|----------------------|-----------------------|
| MD [95% CI]    | 22.0 [-18.0 ;60.0] | -1.3<br>[-12.0 ;9.5] | -2.4<br>[-8.2 ;3.4] | 17.0<br>[-7.9 ;42.0] | -7.1<br>[-40.0 ;26.0] |
| I <sup>2</sup> | -                  | -                    | -                   | 24.5%                | -                     |

Lysholm long term :

| Comparaisons                           | ACI3<br>Vs<br>ACI1 | MF<br>Vs<br>ACI1     | OCT<br>Vs<br>ACI1   | MF<br>Vs<br>ACI3     | OCT<br>Vs<br>MF   |
|----------------------------------------|--------------------|----------------------|---------------------|----------------------|-------------------|
| Trials included/total available trials | 1/2                | 2/3                  | 1/3                 | 1/4                  | 2/3               |
| Patient included in meta-analysis      | 16                 | 80                   | 50                  | 35                   | 92                |
| MD [95% CI]                            | 20.0 [-13.0 ;52.0] | -5.1<br>[-22.0 ;9.9] | 0.68<br>[-6.3 ;7.7] | 3.0<br>[-18.0 ;24.0] | 2.9<br>[-3.3;9.1] |
| I <sup>2</sup>                         | -                  | 27.4%                | -                   | -                    | 63.2%             |

Tegner long term :

| Comparaisons                           | ACI3<br>Vs<br>ACI1 | MF<br>Vs<br>ACI1      | OCT<br>Vs<br>ACI1   | MF<br>Vs<br>ACI3    | OCT<br>Vs<br>MF     |
|----------------------------------------|--------------------|-----------------------|---------------------|---------------------|---------------------|
| Trials included/total available trials | 1/2                | 1/3                   | 1/3                 | 1/4                 | 1/3                 |
| Patient included in meta-analysis      | 16                 | 43                    | 40                  | 35                  | 47                  |
| MD [95% CI]                            | 1.1 [-2.0 ;4.2]    | 0.0005<br>[-1.6 ;1.6] | -0.3<br>[-1.9 ;1.4] | 1.8<br>[-0.03 ;3.6] | -0.30<br>[-1.6;1.0] |
| I <sup>2</sup>                         | -                  | -                     | -                   | -                   | -                   |

IKDC mid term :

| Comparaisons                           | ACI3<br>Vs<br>ACI1 | MF<br>Vs<br>ACI3 | OCT<br>Vs<br>ACI3 | MF<br>Vs<br>AMIC | OCT<br>Vs<br>MF | MF<br>Vs<br>Spheroids |
|----------------------------------------|--------------------|------------------|-------------------|------------------|-----------------|-----------------------|
| Trials included/total available trials | 1/2                | 3/3              | 1/3               | 1/4              | 1/3             | 1/1                   |
| Patient included in                    | 21                 | 195              | 47                | 24               | 57              | 97                    |

|                |                   |                     |                       |                       |                       |                       |
|----------------|-------------------|---------------------|-----------------------|-----------------------|-----------------------|-----------------------|
| meta-analysis  |                   |                     |                       |                       |                       |                       |
| MD [95% CI]    | 6.1 [-21.0 ;33.0] | 7.6<br>[-3.7 ;21.0] | -11.0<br>[-23.0 ;1.5] | -10.0<br>[-25.0 ;4.5] | -10.0<br>[-14.0;-7.3] | -1.6<br>[-14.0 ;11.0] |
| I <sup>2</sup> | -                 | 0.0%                | -                     | -                     | -                     | -                     |

IKDC long term :

| Comparaisons                           | ACI3<br>Vs<br>ACI1 | MF<br>Vs<br>ACI3    | OCT<br>Vs<br>MF        | MF<br>Vs<br>Spheroids |
|----------------------------------------|--------------------|---------------------|------------------------|-----------------------|
| Trials included/total available trials | 1/2                | 3/3                 | 1/3                    | 1/1                   |
| Patient included in meta-analysis      | 16                 | 178                 | 57                     | 97                    |
| MD [95% CI]                            | 10.0 [-13.0 ;34.0] | 3.8<br>[-8.1 ;16.0] | -14.0<br>[-16.0;-12.0] | -4.0<br>[-16.0 ;7.8]  |
| I <sup>2</sup>                         | -                  | 0.0%                | -                      | -                     |

Infections rate :

| Comparaisons                           | ACI3<br>Vs<br>ACI1                                              | ACI3<br>Vs<br>MF | ACI3<br>Vs<br>OCT                                               | AMIC<br>Vs<br>MF                                                | ACI2<br>Vs<br>ACI1                                               | OCT<br>Vs<br>MF  | ACI1<br>Vs<br>OCT | ACI1<br>Vs<br>MF                                                |
|----------------------------------------|-----------------------------------------------------------------|------------------|-----------------------------------------------------------------|-----------------------------------------------------------------|------------------------------------------------------------------|------------------|-------------------|-----------------------------------------------------------------|
| Trials included/total available trials | 1/2                                                             | 2/4              | 1/3                                                             | 1/3                                                             | 1/1                                                              | 2/3              | 1/3               | 1/3                                                             |
| Patient included in meta-analysis      | 21                                                              | 108              | 55                                                              | 30                                                              | 68                                                               | 100              | 40                | 80                                                              |
| RR [95% CI]                            | 2.5 <sup>e</sup> -9 [3.9 <sup>e</sup> -22;1.7 <sup>e</sup> +04] | 0.45 [0.009;9.5] | 1.3 <sup>e</sup> -9 [2.2 <sup>e</sup> -22;7.3 <sup>e</sup> +03] | 1.3 <sup>e</sup> -9 [2.8 <sup>e</sup> -22;6.2 <sup>e</sup> +03] | 7.3 <sup>e</sup> -10 [1.5 <sup>e</sup> -22;3.6 <sup>e</sup> +03] | 2.3 [0.27 ;27.0] | 1.0 [0.03 ;33.0]  | 2.6 <sup>e</sup> -9[3.5 <sup>e</sup> -22 ;1.9 <sup>e</sup> +04] |
| I <sup>2</sup>                         | -                                                               | 41.1%            | -                                                               | -                                                               | -                                                                | 0.0%             | -                 | -                                                               |

Symptomatic cartilage loosening rate :

| Comparaisons                           | ACI3<br>Vs<br>MF | ACI3<br>Vs<br>ACI1 | AMIC<br>Vs<br>MF | ACI1<br>Vs<br>OCT                                                 | ACI1<br>Vs<br>MF    |
|----------------------------------------|------------------|--------------------|------------------|-------------------------------------------------------------------|---------------------|
| Trials included/total available trials | 1/4              | 1/2                | 1/3              | 1/3                                                               | 2/3                 |
| Patient included in meta-analysis      | 48               | 21                 | 30               | 40                                                                | 80                  |
| RR [95% CI]                            | 2.8 [0.16;51.0]  | 0.37 [0.021;6.5]   | 1.1 [0.033;34.0] | 4.7 <sup>e</sup> -10 [7.0 <sup>e</sup> -24 ;3.1 <sup>e</sup> +04] | 0.061[0.0015 ;0.75] |
| I <sup>2</sup>                         | -                | -                  | -                | -                                                                 | 23.5%               |

Total failure rate :

| Comparaisons                           | ACI3<br>Vs<br>MF | ACI2<br>Vs<br>ACI1                                               | ACI1<br>Vs<br>MF | ACI1<br>Vs<br>OCT                                 | OCT<br>Vs<br>MF   | Spheroids<br>Vs<br>MF                               |
|----------------------------------------|------------------|------------------------------------------------------------------|------------------|---------------------------------------------------|-------------------|-----------------------------------------------------|
| Trials included/total available trials | 3/4              | 1/1                                                              | 2/3              | 2/3                                               | 1/3               | 1/1                                                 |
| Patient included in meta-analysis      | 252              | 68                                                               | 192              | 84                                                | 60                | 102                                                 |
| RR [95% CI]                            | 1.9 [0.38;11.0]  | 1.0 <sup>e</sup> -12 [1.1 <sup>e</sup> -29;9.2 <sup>e</sup> +04] | 0.86 [0.23 ;3.3] | 1.3 <sup>e</sup> -10 [1.1 <sup>e</sup> -36 ;0.10] | 0.31 [0.11 ;0.93] | 6.7e-13 [5.7 <sup>e</sup> -30;7.8 <sup>e</sup> +04] |
| I <sup>2</sup>                         | 0.0%             | -                                                                | 0.0%             | 0.0%                                              | -                 | -                                                   |

Total reoperation rate :

| Comparaisons                           | ACI3<br>Vs<br>ACI1 | ACI3<br>Vs<br>MF | AMIC<br>Vs<br>MF | ACI2<br>Vs<br>ACI1 | OCT<br>Vs<br>MF  | ACI1<br>Vs<br>OCT | ACI1<br>Vs<br>MF | Spheroids<br>Vs<br>MF                               |
|----------------------------------------|--------------------|------------------|------------------|--------------------|------------------|-------------------|------------------|-----------------------------------------------------|
| Trials included/total available trials | 2/2                | 3/3              | 2/3              | 1/1                | 2/3              | 2/3               | 3/3              | 1/1                                                 |
| Patient included in meta-analysis      | 41                 | 252              | 77               | 68                 | 102              | 80                | 240              | 102                                                 |
| RR [95% CI]                            | 0.81[0.19 ;3.2]    | 1.0 [0.26 ;3.7]  | 1.1 [0.14 ;8.4]  | 0.31[0.18 ;0.54]   | 0.59 [0.18 ;1.7] | 0.94[0.26 ;2.6]   | 0.75[0.37 ;1.6]  | 7.1e-13 [1.1 <sup>e</sup> -29;4.7 <sup>e</sup> +04] |
| I <sup>2</sup>                         | 0.0%               | 0.0%             | 0.0%             | -                  | 0.0%             | 0.0%              | 0.0%             | -                                                   |

## Bibliography of the tables of Section A

1. Horas U, Pelinkovic D, Herr G, Aigner T, Schnettler R. Autologous chondrocyte implantation and osteochondral cylinder transplantation in cartilage repair of the knee joint. A prospective, comparative trial. *Journal of bone and joint surgery American volume*. 2003;85(2):185-92.
2. Schneider U, Andereya, S. Erste Ergebnisse einer prospektiv randomisierten Vergleichsstudie zur traditionellen ACT und der CaReS-Technologie [First results of a prospective randomized clinical trial on traditional chondrocyte transplantation vs CaReS-Technology]. *Z Orthop Ihre Grenzgeb*. 2003;141(5):496-7.
3. Dozin B, Malpeli M, Cancedda R, Bruzzi P, Calcagno S, Molfetta L, et al. Comparative evaluation of autologous chondrocyte implantation and mosaicplasty: a multicentered randomized clinical trial. *Clinical journal of sport medicine*. 2005;15(4):220-6.
4. Gooding CR, Bartlett W, Bentley G, Skinner JA, Carrington R, Flanagan A. A prospective, randomised study comparing two techniques of autologous chondrocyte implantation for osteochondral defects in the knee: periosteum covered versus type I/III collagen covered. *The knee*. 2006;13(3):203-10.
5. Basad E, Ishaque B, Bachmann G, Stürz H, Steinmeyer J. Matrix-induced autologous chondrocyte implantation versus microfracture in the treatment of cartilage defects of the knee: a 2-year randomised study. *Knee surgery, sports traumatology, arthroscopy*. 2010;18(4):519-27.
6. Saris DB, Vanlauwe J, Victor J, Almqvist KF, Verdonk R, Bellemans J, et al. Treatment of symptomatic cartilage defects of the knee: characterized chondrocyte implantation results in better clinical outcome at 36 months in a randomized trial compared to microfracture. *Am J Sports Med*. 2009;37 Suppl 1:10S-9S.
7. Saris DB, Vanlauwe J, Victor J, Haspl M, Bohnsack M, Fortems Y, et al. Characterized chondrocyte implantation results in better structural repair when treating symptomatic cartilage defects of the knee in a randomized controlled trial versus microfracture. *Am J Sports Med*. 2008;36(2):235-46.
8. Vanlauwe J, Saris DB, Victor J, Almqvist KF, Bellemans J, Luyten FP, et al. Five-year outcome of characterized chondrocyte implantation versus microfracture for symptomatic cartilage defects of the knee: early treatment matters. *Am J Sports Med*. 2011;39(12):2566-74.

9. Gudas R, Gudaite A, Pocius A, Gudiene A, Cekanauskas E, Monastyreckiene E, et al. Ten-year follow-up of a prospective, randomized clinical study of mosaic osteochondral autologous transplantation versus microfracture for the treatment of osteochondral defects in the knee joint of athletes. *American journal of sports medicine*. 2012;40(11):2499-508.
10. Gudas R, Kalesinskas RJ, Kimtys V, Stankevicius E, Toliuisis V, Bernotavicius G, et al. A prospective randomized clinical study of mosaic osteochondral autologous transplantation versus microfracture for the treatment of osteochondral defects in the knee joint in young athletes. *Arthroscopy*. 2005;21(9):1066-75.
11. Lim HC, Bae, J.H., Song, S.H., Park, Y.E., Kim, S.J. Current treatments of isolated articular cartilage lesions of the knee achieve similar outcomes. *Clin Orthop Relat Res*. 2012;470(8):2261-7.
12. Stanish WD, McCormack R, Forriol F, Mohtadi N, Pelet S, Desnoyers J, et al. Novel scaffold-based BST-CarGel treatment results in superior cartilage repair compared with microfracture in a randomized controlled trial. *J Bone Joint Surg Am*. 2013;95(18):1640-50.
13. Shive MS, Stanish WD, McCormack R, Forriol F, Mohtadi N, Pelet S, et al. BST-CarGel(R) Treatment Maintains Cartilage Repair Superiority over Microfracture at 5 Years in a Multicenter Randomized Controlled Trial. *Cartilage*. 2015;6(2):62-72.
14. Clave A, Potel JF, Servien E, Neyret P, Dubrana F, Stindel E. Third-generation autologous chondrocyte implantation versus mosaicplasty for knee cartilage injury: 2-year randomized trial. *J Orthop Res*. 2016;34(4):658-65.
15. Knutsen G, Drogset JO, Engebretsen L, Grøntvedt T, Isaksen V, Ludvigsen TC, et al. A randomized trial comparing autologous chondrocyte implantation with microfracture. Findings at five years. *Journal of bone and joint surgery American volume*. 2007;89(10):2105-12.
16. Knutsen G, Drogset JO, Engebretsen L, Grøntvedt T, Isaksen V, Ludvigsen TC, et al. A randomized trial comparing autologous chondrocyte implantation with microfracture. Findings at five years. *Journal of bone and joint surgery American volume*. 2007;89(10):2105-12.
17. Knutsen G, Drogset JO, Engebretsen L, Grøntvedt T, Ludvigsen TC, Løken S, et al. A Randomized Multicenter Trial Comparing Autologous Chondrocyte Implantation with Microfracture: long-Term Follow-up at 14 to 15 Years. *Journal of bone and joint surgery American volume*. 2016;98(16):1332-9.
18. Anders S, Volz M, Frick H, Gellissen J. A Randomized, Controlled Trial Comparing Autologous Matrix-Induced Chondrogenesis (AMIC(R)) to Microfracture: Analysis of 1- and 2-Year Follow-Up Data of 2 Centers. *Open Orthop J*. 2013;7:133-43.



19. Volz M, Schaumburger J, Frick H, Grifka J, Anders S. A randomized controlled trial demonstrating sustained benefit of Autologous Matrix-Induced Chondrogenesis over microfracture at five years. *International orthopaedics*. 2017;41(4):797-804.
20. Saris D, Price A, Widuchowski W, Bertrand-Marchand M, Caron J, Drogset JO, et al. Matrix-Applied Characterized Autologous Cultured Chondrocytes Versus Microfracture: two-Year Follow-up of a Prospective Randomized Trial. *American journal of sports medicine*. 2014;42(6):1384-94.
21. Brittberg M, Recker D, Ilgenfritz J, Saris DBF. Matrix-Applied Characterized Autologous Cultured Chondrocytes Versus Microfracture: five-Year Follow-up of a Prospective Randomized Trial. *American journal of sports medicine*. 2018;46(6):1343-51.
22. Crawford DC, DeBerardino TM, Williams RJ, 3rd. NeoCart, an autologous cartilage tissue implant, compared with microfracture for treatment of distal femoral cartilage lesions: an FDA phase-II prospective, randomized clinical trial after two years. *J Bone Joint Surg Am*. 2012;94(11):979-89.
23. Kane M, Williams III, R., DeBerardino, T., Taylor, D., Ma, C., Anderson, D., Crawford, D. Review of an exploratory phase II FDA regulated clinical trial of a novel surgical innovation: completion of a prospective, randomized, controlled trial to compare NeoCart with the standard-of-care, microfracture, for articular cartilage repair. *Annals of Joint*. 2018;3.
24. Solheim E, Hegna J, Strand T, Harlem T, Inderhaug E. Randomized Study of Long-term (15-17 Years) Outcome After Microfracture Versus Mosaicplasty in Knee Articular Cartilage Defects. *Am J Sports Med*. 2018;46(4):826-31.
25. Zeifang F, Oberle D, Nierhoff C, Richter W, Moradi B, Schmitt H. Autologous chondrocyte implantation using the original periosteum-cover technique versus matrix-associated autologous chondrocyte implantation: a randomized clinical trial. *Am J Sports Med*. 2010;38(5):924-33.
26. Barie A, Kruck P, Sorbi R, Rehnitz C, Oberle D, Walker T, et al. Prospective Long-term Follow-up of Autologous Chondrocyte Implantation With Periosteum Versus Matrix-Associated Autologous Chondrocyte Implantation: a Randomized Clinical Trial. *American journal of sports medicine*. 2020;48(9):2230-41.

27. Glasbrenner J, Petersen W, Raschke MJ, Steiger M, Verdonk R, Castelli CC, et al. Matrix-Augmented Bone Marrow Stimulation With a Polyglycolic Acid Membrane With Hyaluronan vs Microfracture in Local Cartilage Defects of the Femoral Condyles: a Multicenter Randomized Controlled Trial. *Orthopaedic journal of sports medicine*. 2020;8(5).
28. Ibarra C, Villalobos E, Madrazo-Ibarra A, Velasquillo C, Martinez-Lopez V, Izaguirre A, et al. Arthroscopic Matrix-Assisted Autologous Chondrocyte Transplantation Versus Microfracture: A 6-Year Follow-up of a Prospective Randomized Trial. *Am J Sports Med*. 2021;49(8):2165-76.
29. Hoburg A, Niemeyer P, Laute V, Zinser W, Becher C, Kolombe T, et al. Matrix-Associated Autologous Chondrocyte Implantation with Spheroid Technology Is Superior to Arthroscopic Microfracture at 36 Months Regarding Activities of Daily Living and Sporting Activities after Treatment. *Cartilage*. 2019.
30. Hoburg A, Niemeyer P, Laute V, Zinser W, Becher C, Kolombe T, et al. Sustained superiority in KOOS subscores after matrix-associated chondrocyte implantation using spheroids compared to microfracture. *Knee Surg Sports Traumatol Arthrosc*. 2022.
31. Niemeyer P, Laute V, Zinser W, Becher C, Kolombe T, Fay J, et al. A Prospective, Randomized, Open-Label, Multicenter, Phase III Noninferiority Trial to Compare the Clinical Efficacy of Matrix-Associated Autologous Chondrocyte Implantation With Spheroid Technology Versus Arthroscopic Microfracture for Cartilage Defects of the Knee. *Orthopaedic journal of sports medicine*. 2019;7(7).
